# Supplementary material
Source: PubMed Central journal article supplement (PMC6848775)
Supplement: NIHMS1053169-supplement-SI.pdf [file NIHMS1053169-supplement-SI.pdf]

## **SUPPORTING INFORMATION**

# **Profiling Protein Tyrosine Phosphatase Specificity with SAMDI Mass Spectrometry and Peptide Arrays**

Che-Fan Huang<sup>†</sup> and Milan Mrksich<sup>†‡\*</sup>

<sup>†</sup>Department of Chemistry, Northwestern University, Evanston, IL 60208, United States

<sup>‡</sup>Department of Biomedical Engineering, Northwestern University, Evanston, IL 60208, United States

\*Corresponding Author: Milan Mrksich. E-mail: milan.mrksich@northwestern.edu.

**SI Table 1.** Reaction conditions for profiling phosphatase activities

| Phosphatase       | MilloporeSigma Concentration |                       | time                   | Temperature |
|-------------------|------------------------------|-----------------------|------------------------|-------------|
|                   | Cat. #                       | (nM)                  |                        |             |
| hALP <sup>a</sup> | 524604                       | 1.4 U/mL <sup>b</sup> | 1 h                    | 37 °C       |
| PTP1B (PTPN1)     | P6244                        | 6.7                   | 1 h                    | 37 °C       |
| TC-PTP (PTPN2)    | SRP0218                      | 9.3                   | 1 h                    | 37 °C       |
| MEG1 (PTPN4)      | SRP0205                      | 0.34                  | 1 h                    | 37 °C       |
| SHP1 (PTPN6)      | SRP5076                      | 14                    | 4 h                    | 37 °C       |
| PTPN7             | SRP5077                      | 93                    | overnight <sup>c</sup> | 37 °C       |
| MEG2 (PTPN9)      | SRP0206                      | 4.2                   | 1 h                    | 37 °C       |
| SHP2 WT (PTPN11)  | SRP0217                      | 54                    | 1 h                    | 37 °C       |
| PTPN12            | SRP5073                      | 25                    | overnight              | 37 °C       |
| PTPN13            | SRP5074                      | 20                    | overnight              | 37 °C       |
| PTPN14            | SRP0211                      | 164                   | overnight              | 37 °C       |
| PTPRA             | SRP5078                      | 12.5                  | overnight              | 37 °C       |
| PTPbeta (PTPRB)   | P9864                        | 2.2                   | 1 h                    | 37 °C       |
| CD45 (PTPRC)      | SRP0219                      | 15                    | 1 h                    | 37 °C       |
| PTPRE             | SRP5333                      | 34                    | overnight              | 37 °C       |
| RPTPg (PTPRG)     | SRP0223                      | 10                    | 1 h                    | 37 °C       |
| DEP1 (PTPRJ)      | SRP0220                      | 1.2                   | 1 h                    | 37 °C       |
| PTPmu (PTPRM)     | SRP0222                      | 78                    | 2 h                    | 37 °C       |
| PTPsigma (PTPRS)  | SRP0224                      | 20                    | overnight              | 37 °C       |
| PRL1              | SRP0208                      | 1683                  | overnight              | 37 °C       |
| PRL2              | SRP0209                      | 1745                  | overnight              | 37 °C       |
| PRL3              | SRP0210                      | 1710                  | overnight              | 37 °C       |

<sup>a</sup>Buffer pH adjusted to 8.0, supplied with 2.5 mM Mg<sup>2+</sup>. 0.5 mM Zn<sup>2+</sup>

<sup>b</sup>Molar concentration not provided by the vendor

<sup>c</sup>16-20 h

# Align

## How to use this tool

Align two or more protein sequences with the [Clustal Omega](#) program (see also this [FAQ](#)) to view their characteristics alongside each other.

1. Enter either protein sequences in FASTA format or UniProt identifiers into the form field, for example:

```
TPA_HUMAN
TPA_PIG
```

2. Click the *Run Align* button.

[Help](#) [Align help video](#) [Other tutorials and videos](#) [Downloads](#)

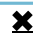

## Alignment

[How to print an alignment in color](#)

```
P10696 PPBN_HUMAN 1 -----MQGPWVLLLLG 11
P18031 PTN1_HUMAN 1 ----- 0
P17706 PTN2_HUMAN 1 ----- 0
P29074 PTN4_HUMAN 1 ----- 0
P29350 PTN6_HUMAN 1 ----- 0
P35236 PTN7_HUMAN 1 ----- 0
P43378 PTN9_HUMAN 1 ----- 0
Q06124 PTN11_HUMAN 1 ----- 0
Q05209 PTN12_HUMAN 1 ----- 0
Q12923 PTN13_HUMAN 1 MHVSLAEALEVRGGPLQEEETIWAFLNQSAESLQELFRKVSADPAALGFIIISPWSLLLLP 60
Q15678 PTN14_HUMAN 1 ----- 0
P18433 PTPRA_HUMAN 1 ----- 0
P23467 PTPRB_HUMAN 1 -----ML----SHGAGLALWITLSLL 17
P08575 PTPRC_HUMAN 1 ----- 0
P23469 PTPRE_HUMAN 1 ----- 0
P23470 PTPRG_HUMAN 1 ----- 0
Q12913 PTPRJ_HUMAN 1 ----- 0
P28827 PTPRM_HUMAN 1 ----- 0
Q13332 PTPRS_HUMAN 1 ----- 0
Q93096 TP4A1_HUMAN 1 ----- 0
Q12974 TP4A2_HUMAN 1 ----- 0
O75365 TP4A3_HUMAN 1 ----- 0
```

```
P10696 PPBN_HUMAN 12 LRLQLSLGIIPVEEENPDFWNRQAAEALGAAK----KLQPAQTAANKLIIFLGDGMGV 66
P18031 PTN1_HUMAN 1 ----- 0
P17706 PTN2_HUMAN 1 ----- 0
P29074 PTN4_HUMAN 1 ----- 0
P29350 PTN6_HUMAN 1 ----- 0
P35236 PTN7_HUMAN 1 ----- 0
P43378 PTN9_HUMAN 1 ----- 0
Q06124 PTN11_HUMAN 1 ----- 0
Q05209 PTN12_HUMAN 1 ----- 0
Q12923 PTN13_HUMAN 61 SGS---VSFTDENISNQDLRAFTAPEVLQNSLTSLSVDEKIHIIYSLGMTLYWGADYEV 117
Q15678 PTN14_HUMAN 1 ----- 0
P18433 PTPRA_HUMAN 1 ----- 0
P23467 PTPRB_HUMAN 18 QTG-----LAEPERCNFTLAES-----KASSHSVSIQWR----- 46
P08575 PTPRC_HUMAN 1 ----- 0
P23469 PTPRE_HUMAN 1 ----- 0
P23470 PTPRG_HUMAN 1 ----- 0
Q12913 PTPRJ_HUMAN 1 ----- 0
P28827 PTPRM_HUMAN 1 ----- 0
Q13332 PTPRS_HUMAN 1 ----- 0
Q93096 TP4A1_HUMAN 1 ----- 0
Q12974 TP4A2_HUMAN 1 ----- 0
O75365 TP4A3_HUMAN 1 ----- 0
```

```
P10696 PPBN_HUMAN 67 TVTAAR-----ILKQKKDKLG----PETFLAM----DRFPYVALSKTYSVDKHV--- 108
P18031 PTN1_HUMAN 1 ----- 0
P17706 PTN2_HUMAN 1 ----- 0
P29074 PTN4_HUMAN 1 ----- 0
P29350 PTN6_HUMAN 1 ----- 0
P35236 PTN7_HUMAN 1 ----- 0
P43378 PTN9_HUMAN 1 ----- 0
Q06124 PTN11_HUMAN 1 ----- 0
Q05209 PTN12_HUMAN 1 ----- 0
Q12923 PTN13_HUMAN 218 QSQPIKLGDLHNSILLGMCEDVIYARVSVRTVLDAACSAHIRNSNCAPSFYVKHLVKLV 177
Q15678 PTN14_HUMAN 1 ----- 0
P18433 PTPRA_HUMAN 1 ----- 0
P23467 PTPRB_HUMAN 47 -----ILGSPCNFSLIYSSDTLGAAL 67
P08575 PTPRC_HUMAN 1 ----- 0
P23469 PTPRE_HUMAN 1 ----- 0
P23470 PTPRG_HUMAN 1 ----- 0
Q12913 PTPRJ_HUMAN 1 ----- 0
P28827 PTPRM_HUMAN 1 ----- 0
Q13332 PTPRS_HUMAN 1 ----- 0
Q93096 TP4A1_HUMAN 1 ----- 0
Q12974 TP4A2_HUMAN 1 ----- 0
O75365 TP4A3_HUMAN 1 ----- 0
```

```
P10696 PPBN_HUMAN 209 -PDSGATATAYLCGV-----KGNFQTIGLSAAARFNQC----NTRRGNEVISVMN 153
P18031 PTN1_HUMAN 1 ----- 0
P17706 PTN2_HUMAN 1 ----- 0
P29074 PTN4_HUMAN 1 ----- 0
P29350 PTN6_HUMAN 1 ----- 0
```

|               |             |     |                                                                |     |
|---------------|-------------|-----|----------------------------------------------------------------|-----|
| <u>P39338</u> | PTN9_HUMAN  | 1   | -----                                                          | 0   |
| <u>Q06124</u> | PTN11_HUMAN | 1   | -----                                                          | 0   |
| <u>Q05209</u> | PTN12_HUMAN | 1   | -----                                                          | 0   |
| <u>Q12923</u> | PTN13_HUMAN | 178 | GNL--SGTDQLSCNSEQKPDERSQAIRDRLRGKGLPTGRSSTSDVLDIQKPPLSHQTFLL-- | 233 |
| <u>Q15678</u> | PTN14_HUMAN | 1   | -----                                                          | 0   |
| <u>P18433</u> | PTPRA_HUMAN | 1   | -----                                                          | 0   |
| <u>P23467</u> | PTPRB_HUMAN | 68  | CPTFRIDNTTYGCNLQDLQAGT--I-YNFRIISLDEE-----RTVVVLQTDPLPPARFGVS  | 119 |
| <u>P08575</u> | PTPRC_HUMAN | 1   | -----                                                          | 0   |
| <u>P23469</u> | PTPRE_HUMAN | 1   | -----                                                          | 0   |
| <u>P23470</u> | PTPRG_HUMAN | 1   | -----                                                          | 0   |
| <u>Q12913</u> | PTPRJ_HUMAN | 1   | -----                                                          | 0   |
| <u>P28827</u> | PTPRM_HUMAN | 1   | -----                                                          | 0   |
| <u>Q13332</u> | PTPRS_HUMAN | 1   | -----                                                          | 0   |
| <u>Q93096</u> | TP4A1_HUMAN | 1   | -----                                                          | 0   |
| <u>Q12974</u> | TP4A2_HUMAN | 1   | -----                                                          | 0   |
| <u>Q75365</u> | TP4A3_HUMAN | 1   | -----                                                          | 0   |

|               |             |     |                                                              |     |
|---------------|-------------|-----|--------------------------------------------------------------|-----|
| <u>P10696</u> | PPBN_HUMAN  | 154 | RAKKAGKSVGVVTTTRVQHASPAGAYAHTVNRNWYSADADVPASARQEGCQDIAT----- | 207 |
| <u>P18031</u> | PTN1_HUMAN  | 1   | -----                                                        | 0   |
| <u>P17706</u> | PTN2_HUMAN  | 1   | -----                                                        | 0   |
| <u>P29074</u> | PTN4_HUMAN  | 1   | -----                                                        | 0   |
| <u>P29350</u> | PTN6_HUMAN  | 1   | -----                                                        | 0   |
| <u>P35236</u> | PTN7_HUMAN  | 1   | -----                                                        | 0   |
| <u>P43378</u> | PTN9_HUMAN  | 1   | -----                                                        | 0   |
| <u>Q06124</u> | PTN11_HUMAN | 1   | -----                                                        | 0   |
| <u>Q05209</u> | PTN12_HUMAN | 1   | -----                                                        | 0   |
| <u>Q12923</u> | PTN13_HUMAN | 234 | -NKGLSKSMGFL-----SIKDTQDENYFKDILSDNSGRESENTFSPYQFKTS         | 280 |
| <u>Q15678</u> | PTN14_HUMAN | 1   | -----                                                        | 0   |
| <u>P18433</u> | PTPRA_HUMAN | 1   | -----                                                        | 0   |
| <u>P23467</u> | PTPRB_HUMAN | 120 | KEKTTSTSLHV-----WW-----TPSSG-----KVTSYEVQLF                  | 147 |
| <u>P08575</u> | PTPRC_HUMAN | 1   | -----                                                        | 0   |
| <u>P23469</u> | PTPRE_HUMAN | 1   | -----                                                        | 0   |
| <u>P23470</u> | PTPRG_HUMAN | 1   | -----                                                        | 0   |
| <u>Q12913</u> | PTPRJ_HUMAN | 1   | -----                                                        | 0   |
| <u>P28827</u> | PTPRM_HUMAN | 1   | -----                                                        | 0   |
| <u>Q13332</u> | PTPRS_HUMAN | 1   | -----                                                        | 0   |
| <u>Q93096</u> | TP4A1_HUMAN | 1   | -----                                                        | 0   |
| <u>Q12974</u> | TP4A2_HUMAN | 1   | -----                                                        | 0   |
| <u>Q75365</u> | TP4A3_HUMAN | 1   | -----                                                        | 0   |

|               |             |     |                                                             |     |
|---------------|-------------|-----|-------------------------------------------------------------|-----|
| <u>P10696</u> | PPBN_HUMAN  | 208 | -----QLISNMDI-----                                          | 215 |
| <u>P18031</u> | PTN1_HUMAN  | 1   | -----                                                       | 0   |
| <u>P17706</u> | PTN2_HUMAN  | 1   | -----                                                       | 0   |
| <u>P29074</u> | PTN4_HUMAN  | 1   | -----                                                       | 0   |
| <u>P29350</u> | PTN6_HUMAN  | 1   | -----                                                       | 0   |
| <u>P35236</u> | PTN7_HUMAN  | 1   | -----                                                       | 0   |
| <u>P43378</u> | PTN9_HUMAN  | 1   | -----                                                       | 0   |
| <u>Q06124</u> | PTN11_HUMAN | 1   | -----                                                       | 0   |
| <u>Q05209</u> | PTN12_HUMAN | 1   | -----                                                       | 0   |
| <u>Q12923</u> | PTN13_HUMAN | 281 | GPEKKPIPGIDVLSKKKIWASSMDLLCTADRFSS-----GETATY---RRC--HPEAV  | 329 |
| <u>Q15678</u> | PTN14_HUMAN | 1   | -----                                                       | 0   |
| <u>P18433</u> | PTPRA_HUMAN | 1   | -----                                                       | 0   |
| <u>P23467</u> | PTPRB_HUMAN | 148 | DENNQKIQGVQIQ-ESTSWNEYTFNLTAGSKYNIATAVSGGKRSFSVYVYNGSTVPSPV | 206 |
| <u>P08575</u> | PTPRC_HUMAN | 1   | -----                                                       | 0   |
| <u>P23469</u> | PTPRE_HUMAN | 1   | -----                                                       | 0   |
| <u>P23470</u> | PTPRG_HUMAN | 1   | -----                                                       | 0   |
| <u>Q12913</u> | PTPRJ_HUMAN | 1   | -----                                                       | 0   |
| <u>P28827</u> | PTPRM_HUMAN | 1   | -----                                                       | 0   |
| <u>Q13332</u> | PTPRS_HUMAN | 1   | -----                                                       | 0   |
| <u>Q93096</u> | TP4A1_HUMAN | 1   | -----                                                       | 0   |
| <u>Q12974</u> | TP4A2_HUMAN | 1   | -----                                                       | 0   |
| <u>Q75365</u> | TP4A3_HUMAN | 1   | -----                                                       | 0   |

|               |             |     |                                                              |     |
|---------------|-------------|-----|--------------------------------------------------------------|-----|
| <u>P10696</u> | PPBN_HUMAN  | 216 | -----                                                        | 215 |
| <u>P18031</u> | PTN1_HUMAN  | 1   | -----                                                        | 0   |
| <u>P17706</u> | PTN2_HUMAN  | 1   | -----                                                        | 0   |
| <u>P29074</u> | PTN4_HUMAN  | 1   | -----                                                        | 0   |
| <u>P29350</u> | PTN6_HUMAN  | 1   | -----                                                        | 0   |
| <u>P35236</u> | PTN7_HUMAN  | 1   | -----                                                        | 0   |
| <u>P43378</u> | PTN9_HUMAN  | 1   | -----                                                        | 0   |
| <u>Q06124</u> | PTN11_HUMAN | 1   | -----                                                        | 0   |
| <u>Q05209</u> | PTN12_HUMAN | 1   | -----                                                        | 0   |
| <u>Q12923</u> | PTN13_HUMAN | 330 | -TVRTSTTPRKKEARYSDGSIALDIFGPQKMDPI--YHTRELPTSSAISALDRIRE-RQ  | 385 |
| <u>Q15678</u> | PTN14_HUMAN | 1   | -----                                                        | 0   |
| <u>P18433</u> | PTPRA_HUMAN | 1   | -----                                                        | 0   |
| <u>P23467</u> | PTPRB_HUMAN | 207 | KDIGISTKANSLLISWSHGSGVVERYLMLMDKGILVHGG-VVDKHATSAYAFHGLTPGYL | 265 |
| <u>P08575</u> | PTPRC_HUMAN | 1   | -----                                                        | 0   |
| <u>P23469</u> | PTPRE_HUMAN | 1   | -----                                                        | 0   |
| <u>P23470</u> | PTPRG_HUMAN | 1   | -----                                                        | 0   |
| <u>Q12913</u> | PTPRJ_HUMAN | 1   | -----                                                        | 0   |
| <u>P28827</u> | PTPRM_HUMAN | 1   | -----                                                        | 0   |
| <u>Q13332</u> | PTPRS_HUMAN | 1   | -----                                                        | 0   |
| <u>Q93096</u> | TP4A1_HUMAN | 1   | -----                                                        | 0   |
| <u>Q12974</u> | TP4A2_HUMAN | 1   | -----                                                        | 0   |
| <u>Q75365</u> | TP4A3_HUMAN | 1   | -----                                                        | 0   |

|               |             |     |                                                            |     |
|---------------|-------------|-----|------------------------------------------------------------|-----|
| <u>P10696</u> | PPBN_HUMAN  | 216 | -----                                                      | 215 |
| <u>P18031</u> | PTN1_HUMAN  | 1   | -----                                                      | 0   |
| <u>P17706</u> | PTN2_HUMAN  | 1   | -----                                                      | 0   |
| <u>P29074</u> | PTN4_HUMAN  | 1   | -----                                                      | 0   |
| <u>P29350</u> | PTN6_HUMAN  | 1   | -----                                                      | 0   |
| <u>P35236</u> | PTN7_HUMAN  | 1   | -----                                                      | 0   |
| <u>P43378</u> | PTN9_HUMAN  | 1   | -----                                                      | 0   |
| <u>Q06124</u> | PTN11_HUMAN | 1   | -----                                                      | 0   |
| <u>Q05209</u> | PTN12_HUMAN | 1   | -----                                                      | 0   |
| <u>Q12923</u> | PTN13_HUMAN | 386 | KKLQVLREAMNVEEPPVRYKYHGDVFTSSESPSI--ISSEDFRQVRRSEASKRFESS  | 443 |
| <u>Q15678</u> | PTN14_HUMAN | 1   | -----                                                      | 0   |
| <u>P18433</u> | PTPRA_HUMAN | 1   | -----                                                      | 0   |
| <u>P23467</u> | PTPRB_HUMAN | 266 | YNLTVMTEAAGL-----QNYRWKLVRTAPMEVSNLKVTNDGSLTSL-----KVKWQRP | 313 |
| <u>P08575</u> | PTPRC_HUMAN | 1   | -----                                                      | 0   |
| <u>P23469</u> | PTPRE_HUMAN | 1   | -----                                                      | 0   |
| <u>P23470</u> | PTPRG_HUMAN | 1   | -----                                                      | 0   |
| <u>Q12913</u> | PTPRJ_HUMAN | 1   | -----                                                      | 0   |

|                   |                        |     |                                                                |     |
|-------------------|------------------------|-----|----------------------------------------------------------------|-----|
| <del>P28827</del> | <del>PTPRM_HUMAN</del> | 1   | -----                                                          | 0   |
| <del>P43332</del> | <del>PTPRM_HUMAN</del> | 1   | -----                                                          | 0   |
| <del>Q93096</del> | <del>TP4A1_HUMAN</del> | 1   | -----                                                          | 0   |
| <del>Q12974</del> | <del>TP4A2_HUMAN</del> | 1   | -----                                                          | 0   |
| <del>Q75365</del> | <del>TP4A3_HUMAN</del> | 1   | -----                                                          | 0   |
|                   |                        |     |                                                                |     |
| P10696            | PPBN_HUMAN             | 216 | -----                                                          | 215 |
| P18031            | PTN1_HUMAN             | 1   | -----                                                          | 0   |
| P17706            | PTN2_HUMAN             | 1   | -----                                                          | 0   |
| P29074            | PTN4_HUMAN             | 1   | -----                                                          | 0   |
| P29350            | PTN6_HUMAN             | 1   | -----                                                          | 0   |
| P35236            | PTN7_HUMAN             | 1   | -----                                                          | 0   |
| P43378            | PTN9_HUMAN             | 1   | -----                                                          | 0   |
| Q06124            | PTN11_HUMAN            | 1   | -----                                                          | 0   |
| Q05209            | PTN12_HUMAN            | 1   | -----                                                          | 0   |
| Q12923            | PTN13_HUMAN            | 444 | SG-LPGVDETL SQGQSRPSRQYETPFEGNLI NQEIMLKRQEELMQLQAKMALRQSRLS   | 502 |
| Q15678            | PTN14_HUMAN            | 1   | -----                                                          | 0   |
| P18433            | PTPRA_HUMAN            | 1   | -----                                                          | 0   |
| P23467            | PTPRB_HUMAN            | 314 | PGNVDSYNITL SHKGTIKESRV-LAPWITETHFKELVP----GRL-----YQVTVS      | 359 |
| P08575            | PTPRC_HUMAN            | 1   | -----                                                          | 0   |
| P23469            | PTPRE_HUMAN            | 1   | -----                                                          | 0   |
| P23470            | PTPRG_HUMAN            | 1   | -----                                                          | 0   |
| Q12913            | PTPRJ_HUMAN            | 1   | -----                                                          | 0   |
| P28827            | PTPRM_HUMAN            | 1   | -----                                                          | 0   |
| Q13332            | PTPRS_HUMAN            | 1   | -----                                                          | 0   |
| Q93096            | TP4A1_HUMAN            | 1   | -----                                                          | 0   |
| Q12974            | TP4A2_HUMAN            | 1   | -----                                                          | 0   |
| Q75365            | TP4A3_HUMAN            | 1   | -----                                                          | 0   |
|                   |                        |     |                                                                |     |
| P10696            | PPBN_HUMAN             | 216 | -----                                                          | 215 |
| P18031            | PTN1_HUMAN             | 1   | -----                                                          | 0   |
| P17706            | PTN2_HUMAN             | 1   | -----                                                          | 0   |
| P29074            | PTN4_HUMAN             | 1   | -----                                                          | 0   |
| P29350            | PTN6_HUMAN             | 1   | -----                                                          | 0   |
| P35236            | PTN7_HUMAN             | 1   | -----                                                          | 0   |
| P43378            | PTN9_HUMAN             | 1   | -----                                                          | 0   |
| Q06124            | PTN11_HUMAN            | 1   | -----                                                          | 0   |
| Q05209            | PTN12_HUMAN            | 1   | -----                                                          | 0   |
| Q12923            | PTN13_HUMAN            | 503 | LYPGDTIKASMLDITRD-PLREIALETA--MTQRKLRNFFGPEFVKMTIEPFIS-----    | 553 |
| Q15678            | PTN14_HUMAN            | 1   | -----                                                          | 0   |
| P18433            | PTPRA_HUMAN            | 1   | -----                                                          | 0   |
| P23467            | PTPRB_HUMAN            | 360 | CVSGELSAQ-KMAVGRTFPDKVANLEANNNGRMRS LVVSWSP-----               | 401 |
| P08575            | PTPRC_HUMAN            | 1   | -----                                                          | 0   |
| P23469            | PTPRE_HUMAN            | 1   | -----                                                          | 0   |
| P23470            | PTPRG_HUMAN            | 1   | -----                                                          | 0   |
| Q12913            | PTPRJ_HUMAN            | 1   | -----                                                          | 0   |
| P28827            | PTPRM_HUMAN            | 1   | -----                                                          | 0   |
| Q13332            | PTPRS_HUMAN            | 1   | -----MAPTWGPGMVSVVGP MGLLVVLLVG                                | 25  |
| Q93096            | TP4A1_HUMAN            | 1   | -----                                                          | 0   |
| Q12974            | TP4A2_HUMAN            | 1   | -----                                                          | 0   |
| Q75365            | TP4A3_HUMAN            | 1   | -----                                                          | 0   |
|                   |                        |     |                                                                |     |
| P10696            | PPBN_HUMAN             | 216 | -----                                                          | 215 |
| P18031            | PTN1_HUMAN             | 1   | -----                                                          | 0   |
| P17706            | PTN2_HUMAN             | 1   | -----                                                          | 0   |
| P29074            | PTN4_HUMAN             | 1   | -----                                                          | 0   |
| P29350            | PTN6_HUMAN             | 1   | -----                                                          | 0   |
| P35236            | PTN7_HUMAN             | 1   | -----                                                          | 0   |
| P43378            | PTN9_HUMAN             | 1   | -----                                                          | 0   |
| Q06124            | PTN11_HUMAN            | 1   | -----                                                          | 0   |
| Q05209            | PTN12_HUMAN            | 1   | -----                                                          | 0   |
| Q12923            | PTN13_HUMAN            | 554 | ----LD-----LPRSILTKKGKNEDNRRKVNIMLLN                           | 580 |
| Q15678            | PTN14_HUMAN            | 1   | -----                                                          | 0   |
| P18433            | PTPRA_HUMAN            | 1   | -----                                                          | 0   |
| P23467            | PTPRB_HUMAN            | 402 | -----AGDWEQYRIL LFN                                            | 414 |
| P08575            | PTPRC_HUMAN            | 1   | -----                                                          | 0   |
| P23469            | PTPRE_HUMAN            | 1   | -----                                                          | 0   |
| P23470            | PTPRG_HUMAN            | 1   | -----                                                          | 0   |
| Q12913            | PTPRJ_HUMAN            | 1   | -----                                                          | 0   |
| P28827            | PTPRM_HUMAN            | 1   | -----                                                          | 0   |
| Q13332            | PTPRS_HUMAN            | 26  | GCAAEPPRFI KEPKDQIGVSGGVSFVCQATGDPKPRVTWNKKGK VNSQRF-ETIEFD    | 84  |
| Q93096            | TP4A1_HUMAN            | 1   | -----                                                          | 0   |
| Q12974            | TP4A2_HUMAN            | 1   | -----                                                          | 0   |
| Q75365            | TP4A3_HUMAN            | 1   | -----                                                          | 0   |
|                   |                        |     |                                                                |     |
| P10696            | PPBN_HUMAN             | 216 | -----                                                          | 215 |
| P18031            | PTN1_HUMAN             | 1   | -----                                                          | 0   |
| P17706            | PTN2_HUMAN             | 1   | -----                                                          | 0   |
| P29074            | PTN4_HUMAN             | 1   | -----                                                          | 0   |
| P29350            | PTN6_HUMAN             | 1   | -----                                                          | 0   |
| P35236            | PTN7_HUMAN             | 1   | -----                                                          | 0   |
| P43378            | PTN9_HUMAN             | 1   | -----                                                          | 0   |
| Q06124            | PTN11_HUMAN            | 1   | -----                                                          | 0   |
| Q05209            | PTN12_HUMAN            | 1   | -----                                                          | 0   |
| Q12923            | PTN13_HUMAN            | 581 | GQ-RLELTCDTKTIC--KDV FDMVVA-HIGLVEHHLFALATLKDNEYFFVDPDLKLT KVA | 636 |
| Q15678            | PTN14_HUMAN            | 1   | -----                                                          | 0   |
| P18433            | PTPRA_HUMAN            | 1   | -----                                                          | 0   |
| P23467            | PTPRB_HUMAN            | 415 | DS-VVLLN---ITVG--KEETQYVMD-DTGLVPGRQYEVIVIVES-----             | 452 |
| P08575            | PTPRC_HUMAN            | 1   | -----                                                          | 0   |
| P23469            | PTPRE_HUMAN            | 1   | -----                                                          | 0   |
| P23470            | PTPRG_HUMAN            | 1   | -----                                                          | 0   |
| Q12913            | PTPRJ_HUMAN            | 1   | -----                                                          | 0   |
| P28827            | PTPRM_HUMAN            | 1   | -----                                                          | 0   |
| Q13332            | PTPRS_HUMAN            | 85  | ESAGAVLRIQPLRTPRDENVYECVAQNSVGEITVH-AKLTVLREDQ-----L           | 130 |
| Q93096            | TP4A1_HUMAN            | 1   | -----                                                          | 0   |
| Q12974            | TP4A2_HUMAN            | 1   | -----                                                          | 0   |
| Q75365            | TP4A3_HUMAN            | 1   | -----                                                          | 0   |
|                   |                        |     |                                                                |     |
| P10696            | PPBN_HUMAN             | 216 | -----                                                          | 215 |
| P18031            | PTN1_HUMAN             | 1   | -----                                                          | 0   |
| P17706            | PTN2_HUMAN             | 1   | -----                                                          | 0   |
| P29074            | PTN4_HUMAN             | 1   | -----                                                          | 0   |

P29350 PTN9\_HUMAN 1 ----- 0  
P43378 PTN9\_HUMAN 1 ----- 0  
Q06124 PTN11\_HUMAN 1 ----- 0  
Q05209 PTN12\_HUMAN 1 ----- 0  
Q12923 PTN13\_HUMAN 637 PEGWKEEPK----KTKATVNFT-LFFRIKFFMDD-VSLI-QHT-LTCHQYYLQLRKDIL 688  
Q15678 PTN14\_HUMAN 1 ----- 0  
P18433 PTPRA\_HUMAN 1 ----- 0  
P23467 PTPRB\_HUMAN 453 --GNLKNSE----RCQGRTPVPLAVLQLRVKHANETSLSIMWQTPVAWEKYIISLA---- 502  
P08575 PTPRC\_HUMAN 1 ----- 0  
P23469 PTPRE\_HUMAN 1 ----- 0  
P23470 PTPRG\_HUMAN 1 ----- 0  
Q12913 PTPRJ\_HUMAN 1 ----- 0  
P28827 PTPRM\_HUMAN 1 ----- 0  
Q13332 PTPRS\_HUMAN 131 PSGFPNIDMGPOLKVVVERTRTATMLCA-----ASGNPDPEITWFKDFLPVDPSPAS 180  
Q93096 TP4A1\_HUMAN 1 ----- 0  
Q12974 TP4A2\_HUMAN 1 ----- 0  
Q75365 TP4A3\_HUMAN 1 ----- 0

P10696 PPBN\_HUMAN 216 ----- 215  
P18031 PTN1\_HUMAN 1 ----- 0  
P17706 PTN2\_HUMAN 1 ----- 0  
P29074 PTN4\_HUMAN 1 ----- 0  
P29350 PTN6\_HUMAN 1 ----- 0  
P35236 PTN7\_HUMAN 1 ----- 0  
P43378 PTN9\_HUMAN 1 ----- 0  
Q06124 PTN11\_HUMAN 1 ----- 0  
Q05209 PTN12\_HUMAN 1 ----- 0  
Q12923 PTN13\_HUMAN 689 EERMHCDD-----ETSLLLASLALQAEYGDYQPEVHGVSYFRMEHYLPARVMEK 737  
Q15678 PTN14\_HUMAN 1 ----- 0  
P18433 PTPRA\_HUMAN 1 ----- 0  
P23467 PTPRB\_HUMAN 503 -----DR-----DLLLIHKSLSKDAKEFTFDLVPGRKYMATVTSISGLKNS 545  
P08575 PTPRC\_HUMAN 1 ----- 0  
P23469 PTPRE\_HUMAN 1 ----- 0  
P23470 PTPRG\_HUMAN 1 ----- 0  
Q12913 PTPRJ\_HUMAN 1 -----MKPAAREARLPPRSPGLRWALPLLL----- 25  
P28827 PTPRM\_HUMAN 1 ----- 0  
Q13332 PTPRS\_HUMAN 181 NGRIKQLRSETFESTPIRGALQIESSEETDQGYECVATNSAGVRYSSPANLYVRELREV 240  
Q93096 TP4A1\_HUMAN 1 ----- 0  
Q12974 TP4A2\_HUMAN 1 ----- 0  
Q75365 TP4A3\_HUMAN 1 ----- 0

P10696 PPBN\_HUMAN 216 ----- 215  
P18031 PTN1\_HUMAN 1 ----- 0  
P17706 PTN2\_HUMAN 1 ----- 0  
P29074 PTN4\_HUMAN 1 ----- 0  
P29350 PTN6\_HUMAN 1 ----- 0  
P35236 PTN7\_HUMAN 1 ----- 0  
P43378 PTN9\_HUMAN 1 ----- 0  
Q06124 PTN11\_HUMAN 1 ----- 0  
Q05209 PTN12\_HUMAN 1 ----- 0  
Q12923 PTN13\_HUMAN 738 LD--LSYIKEELPKLHNTY-----VGASEKETELEFLKVC----- 770  
Q15678 PTN14\_HUMAN 1 ----- 0  
P18433 PTPRA\_HUMAN 1 ----- 0  
P23467 PTPRB\_HUMAN 546 SSVKGRTPVAQVTDLHVANQGM-----TSSLFTNWTQAQGDVEFYQVLLIHENVV 595  
P08575 PTPRC\_HUMAN 1 ----- 0  
P23469 PTPRE\_HUMAN 1 ----- 0  
P23470 PTPRG\_HUMAN 1 ----- 0  
Q12913 PTPRJ\_HUMAN 26 -----LLL----- 28  
P28827 PTPRM\_HUMAN 1 ----- 0  
Q13332 PTPRS\_HUMAN 241 RRVAPRFS--ILPMSHEIMPGGNVNITCVAVGSPMPYVKWMQGAEDLTPEDDMPVGRNVL 298  
Q93096 TP4A1\_HUMAN 1 ----- 0  
Q12974 TP4A2\_HUMAN 1 ----- 0  
Q75365 TP4A3\_HUMAN 1 ----- 0

P10696 PPBN\_HUMAN 216 ----- 215  
P18031 PTN1\_HUMAN 1 ----- 0  
P17706 PTN2\_HUMAN 1 ----- 0  
P29074 PTN4\_HUMAN 1 ----- 0  
P29350 PTN6\_HUMAN 1 ----- 0  
P35236 PTN7\_HUMAN 1 ----- 0  
P43378 PTN9\_HUMAN 1 ----- 0  
Q06124 PTN11\_HUMAN 1 ----- 0  
Q05209 PTN12\_HUMAN 1 ----- 0  
Q12923 PTN13\_HUMAN 771 -----QRLTEYGVHFRVHPEKKSQTGILLGVCSKGVLFVHNGVRTLVLRFPWRET 823  
Q15678 PTN14\_HUMAN 1 ----- 0  
P18433 PTPRA\_HUMAN 1 ----- 0  
P23467 PTPRB\_HUMAN 596 IKNESISSETSRYSFHSLK----SGSLYSVVVTTVSGGISSRQVVVEGRTVP----- 643  
P08575 PTPRC\_HUMAN 1 ----- 0  
P23469 PTPRE\_HUMAN 1 ----- 0  
P23470 PTPRG\_HUMAN 1 ----- 0  
Q12913 PTPRJ\_HUMAN 29 -----R----LGQI-----LCAGGTP-----SP----- 42  
P28827 PTPRM\_HUMAN 1 -----MRGLGTCLAT----- 10  
Q13332 PTPRS\_HUMAN 299 -----ELTDVKDSANYTCVAMSSLGVIEAVAQITVKS LPK----- 333  
Q93096 TP4A1\_HUMAN 1 ----- 0  
Q12974 TP4A2\_HUMAN 1 ----- 0  
Q75365 TP4A3\_HUMAN 1 ----- 0

P10696 PPBN\_HUMAN 216 ----- 215  
P18031 PTN1\_HUMAN 1 ----- 0  
P17706 PTN2\_HUMAN 1 ----- 0  
P29074 PTN4\_HUMAN 1 ----- 0  
P29350 PTN6\_HUMAN 1 ----- 0  
P35236 PTN7\_HUMAN 1 ----- 0  
P43378 PTN9\_HUMAN 1 ----- 0  
Q06124 PTN11\_HUMAN 1 ----- 0  
Q05209 PTN12\_HUMAN 1 ----- 0  
Q12923 PTN13\_HUMAN 824 KKISFSKKITLQNTSDGIKHGFQTDNSKICQYLHLCSYQHKFQLQMRARQSNQDAQDI 883  
Q15678 PTN14\_HUMAN 1 ----- 0  
P18433 PTPRA\_HUMAN 1 ----- 0  
P23467 PTPRB\_HUMAN 644 ----SSVSGVTVN-----NSGRNDYL-SVS----WLLAPGD-VDNYEVTLS 679  
P08575 PTPRC\_HUMAN 1 ----- 0  
P23469 PTPRE\_HUMAN 1 ----- 0

|               |             |      |                                                             |      |
|---------------|-------------|------|-------------------------------------------------------------|------|
| <u>P23470</u> | PTPRG_HUMAN | 43   | ====IPDPSVATV=====ATGENGIT-QISSTAESFHKQNGTGTPOVETNFS        | 80   |
| <u>P28827</u> | PTPRM_HUMAN | 11   | ---LAGLLLT-----AAGETFSGGC-----LFD-E---                      | 31   |
| <u>Q13332</u> | PTPRS_HUMAN | 334  | ---APGTPMVTENTATSITITWDSGNPDPVSY--VIEYKSKSQDGPYQIK-EDI      | 382  |
| <u>Q93096</u> | TP4A1_HUMAN | 1    | -----                                                       | 0    |
| <u>Q12974</u> | TP4A2_HUMAN | 1    | -----                                                       | 0    |
| <u>Q75365</u> | TP4A3_HUMAN | 1    | -----                                                       | 0    |
| <u>P10696</u> | PPBN_HUMAN  | 216  | -----                                                       | 215  |
| <u>P18031</u> | PTN1_HUMAN  | 1    | -----                                                       | 0    |
| <u>P17706</u> | PTN2_HUMAN  | 1    | -----                                                       | 0    |
| <u>P29074</u> | PTN4_HUMAN  | 1    | -----                                                       | 0    |
| <u>P29350</u> | PTN6_HUMAN  | 1    | -----                                                       | 0    |
| <u>P35236</u> | PTN7_HUMAN  | 1    | -----                                                       | 0    |
| <u>P43378</u> | PTN9_HUMAN  | 1    | -----                                                       | 0    |
| <u>Q06124</u> | PTN11_HUMAN | 1    | -----                                                       | 0    |
| <u>Q05209</u> | PTN12_HUMAN | 1    | -----                                                       | 0    |
| <u>Q12923</u> | PTN13_HUMAN | 884  | ERASFRSLNLQAESVRGFN-----MGRA-----ISTGSLASSTLNK--LAVRPL      | 925  |
| <u>Q15678</u> | PTN14_HUMAN | 1    | -----                                                       | 0    |
| <u>P18433</u> | PTPRA_HUMAN | 1    | -----                                                       | 0    |
| <u>P23467</u> | PTPRB_HUMAN | 680  | HDGKVVQSLVIAKSVRECSFS---SLTPGRLYTVTITTRSGKYENHSFSQ---ERTVPD | 732  |
| <u>P08575</u> | PTPRC_HUMAN | 1    | -----                                                       | 0    |
| <u>P23469</u> | PTPRE_HUMAN | 1    | -----                                                       | 0    |
| <u>P23470</u> | PTPRG_HUMAN | 1    | -----                                                       | 0    |
| <u>Q12913</u> | PTPRJ_HUMAN | 85   | EDGESSGA--NDSLRL-----TPEQGSNGTDGASQKTPSSSTGPS               | 120  |
| <u>P28827</u> | PTPRM_HUMAN | 32   | ---PYSTCGYSQSEGGDFNWE-QVNTLTK-----PTSDP-                    | 61   |
| <u>Q13332</u> | PTPRS_HUMAN | 383  | TTTRYSIGGLSPNSEY-EIWSAVNSIGQGPPE-SVVTRTGEQA-----PASAPR      | 431  |
| <u>Q93096</u> | TP4A1_HUMAN | 1    | -----                                                       | 0    |
| <u>Q12974</u> | TP4A2_HUMAN | 1    | -----                                                       | 0    |
| <u>Q75365</u> | TP4A3_HUMAN | 1    | -----                                                       | 0    |
| <u>P10696</u> | PPBN_HUMAN  | 216  | -----                                                       | 215  |
| <u>P18031</u> | PTN1_HUMAN  | 1    | -----                                                       | 0    |
| <u>P17706</u> | PTN2_HUMAN  | 1    | -----                                                       | 0    |
| <u>P29074</u> | PTN4_HUMAN  | 1    | -----                                                       | 0    |
| <u>P29350</u> | PTN6_HUMAN  | 1    | -----                                                       | 0    |
| <u>P35236</u> | PTN7_HUMAN  | 1    | -----                                                       | 0    |
| <u>P43378</u> | PTN9_HUMAN  | 1    | -----                                                       | 0    |
| <u>Q06124</u> | PTN11_HUMAN | 1    | -----                                                       | 0    |
| <u>Q05209</u> | PTN12_HUMAN | 1    | -----                                                       | 0    |
| <u>Q12923</u> | PTN13_HUMAN | 926  | SVQAEILKRLSCELSLYQPLQNSSKEKNDKASWEEKPREMSKSYHDLSQASLYPHRKNV | 985  |
| <u>Q15678</u> | PTN14_HUMAN | 1    | -----                                                       | 0    |
| <u>P18433</u> | PTPRA_HUMAN | 1    | -----                                                       | 0    |
| <u>P23467</u> | PTPRB_HUMAN | 733  | KVQG-----VSVSNSARSDYLRVSWVHATGDFDHY-----EVT                 | 765  |
| <u>P08575</u> | PTPRC_HUMAN | 1    | -----                                                       | 0    |
| <u>P23469</u> | PTPRE_HUMAN | 1    | -----                                                       | 0    |
| <u>P23470</u> | PTPRG_HUMAN | 1    | -----                                                       | 0    |
| <u>Q12913</u> | PTPRJ_HUMAN | 121  | PVFD-----IKA-VSISPTNVILTWKSNDAASEY-----KYV                  | 152  |
| <u>P28827</u> | PTPRM_HUMAN | 62   | ---WM-----PSGSFMLVN-----ASGRP-----EGQRA                     | 82   |
| <u>Q13332</u> | PTPRS_HUMAN | 432  | NVQARM-----LSATTMIVQWEEPVEPNGLI-----RGYRV                   | 462  |
| <u>Q93096</u> | TP4A1_HUMAN | 1    | -----                                                       | 0    |
| <u>Q12974</u> | TP4A2_HUMAN | 1    | -----                                                       | 0    |
| <u>Q75365</u> | TP4A3_HUMAN | 1    | -----                                                       | 0    |
| <u>P10696</u> | PPBN_HUMAN  | 216  | -----DV                                                     | 217  |
| <u>P18031</u> | PTN1_HUMAN  | 1    | -----                                                       | 0    |
| <u>P17706</u> | PTN2_HUMAN  | 1    | -----                                                       | 0    |
| <u>P29074</u> | PTN4_HUMAN  | 1    | -----                                                       | 0    |
| <u>P29350</u> | PTN6_HUMAN  | 1    | -----                                                       | 0    |
| <u>P35236</u> | PTN7_HUMAN  | 1    | -----                                                       | 0    |
| <u>P43378</u> | PTN9_HUMAN  | 1    | -----                                                       | 0    |
| <u>Q06124</u> | PTN11_HUMAN | 1    | -----                                                       | 0    |
| <u>Q05209</u> | PTN12_HUMAN | 1    | -----                                                       | 0    |
| <u>Q12923</u> | PTN13_HUMAN | 986  | IVNMEPPPQTVAELVGKPSHQMSRSDAESLAGVTKLNNSKVASLNRSPERRKHESDSSS | 1045 |
| <u>Q15678</u> | PTN14_HUMAN | 1    | -----                                                       | 0    |
| <u>P18433</u> | PTPRA_HUMAN | 1    | -----                                                       | 0    |
| <u>P23467</u> | PTPRB_HUMAN | 766  | IKNKNNFIQTKSIPKSENEC-----VFV                                | 788  |
| <u>P08575</u> | PTPRC_HUMAN | 1    | -----                                                       | 0    |
| <u>P23469</u> | PTPRE_HUMAN | 1    | -----                                                       | 0    |
| <u>P23470</u> | PTPRG_HUMAN | 1    | -----                                                       | 0    |
| <u>Q12913</u> | PTPRJ_HUMAN | 153  | VKHKMENEKTI-TVVHQPC-----NIT                                 | 174  |
| <u>P28827</u> | PTPRM_HUMAN | 83   | -----HLL-LPQ--LKENDTHCIDF-HYFVSSK-----S                     | 107  |
| <u>Q13332</u> | PTPRS_HUMAN | 463  | -----YYTMEPEHPVGNWQKHNVDD-SLLTTVGSLL-----ED                 | 494  |
| <u>Q93096</u> | TP4A1_HUMAN | 1    | -----                                                       | 0    |
| <u>Q12974</u> | TP4A2_HUMAN | 1    | -----                                                       | 0    |
| <u>Q75365</u> | TP4A3_HUMAN | 1    | -----                                                       | 0    |
| <u>P10696</u> | PPBN_HUMAN  | 218  | ILGGGRKYMFP-----                                            | 228  |
| <u>P18031</u> | PTN1_HUMAN  | 1    | -----                                                       | 0    |
| <u>P17706</u> | PTN2_HUMAN  | 1    | -----                                                       | 0    |
| <u>P29074</u> | PTN4_HUMAN  | 1    | -----                                                       | 0    |
| <u>P29350</u> | PTN6_HUMAN  | 1    | -----                                                       | 0    |
| <u>P35236</u> | PTN7_HUMAN  | 1    | -----                                                       | 0    |
| <u>P43378</u> | PTN9_HUMAN  | 1    | -----                                                       | 0    |
| <u>Q06124</u> | PTN11_HUMAN | 1    | -----                                                       | 0    |
| <u>Q05209</u> | PTN12_HUMAN | 1    | -----                                                       | 0    |
| <u>Q12923</u> | PTN13_HUMAN | 1046 | IEDPGQAYVLGMTMHSSGNS-----SSQVPLKENDVLHKRWSIVSSP             | 1087 |
| <u>Q15678</u> | PTN14_HUMAN | 1    | -----                                                       | 0    |
| <u>P18433</u> | PTPRA_HUMAN | 1    | -----                                                       | 0    |
| <u>P23467</u> | PTPRB_HUMAN | 789  | QLVPGRLYSVTVTTKSGQYEANEQG--NGRTIPEPVKDLTLNRSTEDLHVTWSGANGD  | 845  |
| <u>P08575</u> | PTPRC_HUMAN | 1    | -----                                                       | 0    |
| <u>P23469</u> | PTPRE_HUMAN | 1    | -----                                                       | 0    |
| <u>P23470</u> | PTPRG_HUMAN | 1    | -----                                                       | 0    |
| <u>Q12913</u> | PTPRJ_HUMAN | 175  | GLRPATSYVFSITPGIGNETWGDPR-VIKVITEPIPVSDLRVALTGRKAALSWSNNGT  | 233  |
| <u>P28827</u> | PTPRM_HUMAN | 108  | NSPPGLLNVI--VKVNNGLGNPIWNI-----SGDPTR--TWNRAELAISTFWPNF--   | 154  |
| <u>Q13332</u> | PTPRS_HUMAN | 495  | ETYYTRVLAF---TSVGDGLSDPIQVKTQQGVPGQPMNLRAEARSETSITLWSVPPRQE | 551  |
| <u>Q93096</u> | TP4A1_HUMAN | 1    | -----                                                       | 0    |
| <u>Q12974</u> | TP4A2_HUMAN | 1    | -----                                                       | 0    |
| <u>Q75365</u> | TP4A3_HUMAN | 1    | -----                                                       | 0    |
| <u>P10696</u> | PPBN_HUMAN  | 229  | -----                                                       | 228  |
| <u>P18031</u> | PTN1_HUMAN  | 1    | -----                                                       | 0    |

P29004 PTN2\_HUMAN 1 ----- 0  
 P29350 PTN6\_HUMAN 1 ----- 0  
 P35236 PTN7\_HUMAN 1 ----- 0  
 P43378 PTN9\_HUMAN 1 ----- 0  
 Q06124 PTN11\_HUMAN 1 ----- 0  
 Q05209 PTN12\_HUMAN 1 ----- 0  
 Q12923 PTN13\_HUMAN 1088 E-----REITLVNLKKD--AKYGLGFQIIGGKMGRLDL-- 1119  
 Q15678 PTN14\_HUMAN 1 ----- 0  
 P18433 PTPRA\_HUMAN 1 ----- 0  
 P23467 PTPRB\_HUMAN 846 VDQYEIQLLFNDMKVFP--PFHLVNTATEYRFTSLTPG--RQYKILVLTISGDVQQSAFI-- 901  
 P08575 PTPRC\_HUMAN 1 -----MTMYLWLKL---LAFG--FAFL----- 17  
 P23469 PTPRE\_HUMAN 1 ----- 0  
 P23470 PTPRG\_HUMAN 1 -----MRRLLPCWILFLKITSSVLHYVVCFPALTEGYVGL--H- 39  
 Q12913 PTPRJ\_HUMAN 234 ASCRVL---LESIGSHE-EL-TQDSRLQVNISGLKPG--VQYNINPYLLQSNKTKGDPLGT 287  
 P28827 PTPRM\_HUMAN 155 ---YQVIFE-----VITSGHQGYL--- 170  
 Q13332 PTPRS\_HUMAN 552 S-IIKYELLFREGDHGREVGRFTDPTTSYVVEDLKPNT-TEYA--FRLAARSPQGLGAFT- 606  
 Q93096 TP4A1\_HUMAN 1 ----- 0  
 Q12974 TP4A2\_HUMAN 1 ----- 0  
 O75365 TP4A3\_HUMAN 1 ----- 0

P10696 PPBN\_HUMAN 229 ----- 228  
 P18031 PTN1\_HUMAN 1 ----- 0  
 P17706 PTN2\_HUMAN 1 ----- 0  
 P29074 PTN4\_HUMAN 1 ----- 0  
 P29350 PTN6\_HUMAN 1 ----- 0  
 P35236 PTN7\_HUMAN 1 ----- 0  
 P43378 PTN9\_HUMAN 1 ----- 0  
 Q06124 PTN11\_HUMAN 1 ----- 0  
 Q05209 PTN12\_HUMAN 1 ----- 0  
 Q12923 PTN13\_HUMAN 1120 -----GFISSVAPGGPADLDGCLKPGDRLISVNSVSLGVSHHA-AI----EI 1163  
 Q15678 PTN14\_HUMAN 1 ----- 0  
 P18433 PTPRA\_HUMAN 1 ----- 0  
 P23467 PTPRB\_HUMAN 902 -EGFTVPSAVKNIHISPNGA--TDSLTVNWTGGGDVDSYTVS--AFRHSQ-KV---DS 951  
 P08575 PTPRC\_HUMAN 18 -----DTEVFVTGQSPTPSPT--GLTTAKMPS 42  
 P23469 PTPRE\_HUMAN 1 -----E-----NRHGSAVQ--IRR 51  
 P23470 PTPRG\_HUMAN 40 -----E-----NRHGSAVQ--IRR 51  
 Q12913 PTPRJ\_HUMAN 288 EGGLDASNTERSRAGSPTAPVHDESLVGPVDPSSGQQ----- 324  
 P28827 PTPRM\_HUMAN 171 ----- 170  
 Q13332 PTPRS\_HUMAN 607 -----PVVRQRTLQSKSPAP---PQDVKCVSVRSTAILVSWRPPPETHNGALVGYSVRY 658  
 Q93096 TP4A1\_HUMAN 1 ----- 0  
 Q12974 TP4A2\_HUMAN 1 ----- 0  
 O75365 TP4A3\_HUMAN 1 ----- 0

P10696 PPBN\_HUMAN 229 ----- 228  
 P18031 PTN1\_HUMAN 1 ----- 0  
 P17706 PTN2\_HUMAN 1 ----- 0  
 P29074 PTN4\_HUMAN 1 -----MTRSRFRLPAGRTYNVRASELARDRQHT-E-VVCNILLDN 38  
 P29350 PTN6\_HUMAN 1 ----- 0  
 P35236 PTN7\_HUMAN 1 ----- 0  
 P43378 PTN9\_HUMAN 1 ----- 0  
 Q06124 PTN11\_HUMAN 1 ----- 0  
 Q05209 PTN12\_HUMAN 1 ----- 0  
 Q12923 PTN13\_HUMAN 1164 -----LQNAPEdVT---LV-----ISQPK-EKISK-VPSTPVHLTN 1194  
 Q15678 PTN14\_HUMAN 1 -----MPFGLKLRRTRYNVLKNC----- 20  
 P18433 PTPRA\_HUMAN 1 ----- 0  
 P23467 PTPRB\_HUMAN 952 -----QTIPKHVFEHTFHRLEAGEQYQIMIASVSG--SLKN--QINVVGRTV 994  
 P08575 PTPRC\_HUMAN 43 VPLS--SDPLPTHHTAFSPAST-----FERENDSETT---TSLSPDNTSTQV---- 85  
 P23469 PTPRE\_HUMAN 1 ----- 0  
 P23470 PTPRG\_HUMAN 52 -RKASGDOPYWAYSGAYGP-----EHWVTSSVSC-----GGRHQ----- 83  
 Q12913 PTPRJ\_HUMAN 325 -----SRDTEVLVGLLEPGTRYNATVYSQAANGTEGQ--PQAIIEFRTN 365  
 P28827 PTPRM\_HUMAN 171 ----- 170  
 Q13332 PTPRS\_HUMAN 659 RPLGSEDPEPKEVNGIPPTTQIL--LEALEKWTQYRITVAHEVGPPESSPVVVRT 715  
 Q93096 TP4A1\_HUMAN 1 ----- 0  
 Q12974 TP4A2\_HUMAN 1 ----- 0  
 O75365 TP4A3\_HUMAN 1 ----- 0

P10696 PPBN\_HUMAN 229 ----- 228  
 P18031 PTN1\_HUMAN 1 ----- 0  
 P17706 PTN2\_HUMAN 1 ----- 0  
 P29074 PTN4\_HUMAN 39 TVQAF---KVNK-----HDQGQVLLDVVFK----HL----- 62  
 P29350 PTN6\_HUMAN 1 ----- 0  
 P35236 PTN7\_HUMAN 1 ----- 0  
 P43378 PTN9\_HUMAN 1 ----- 0  
 Q06124 PTN11\_HUMAN 1 ----- 0  
 Q05209 PTN12\_HUMAN 1 ----- 0  
 Q12923 PTN13\_HUMAN 1195 EMKNYMKKSSYMQSDAIDSSSKDHHWSRGLRHISENSFG----PS----- 1236  
 Q15678 PTN14\_HUMAN 21 -----FVTRIRLLDS-----NVIE-----CT-----LSVESTG 43  
 P18433 PTPRA\_HUMAN 1 ----- 0  
 P23467 PTPRB\_HUMAN 995 PASVQ---GVIADNAYSSYSLIVSWQKAAGVA---ERYD---I L L L TENG I L L R N T S 1042  
 P08575 PTPRC\_HUMAN 86 -----SPDSLNASAFNNTGVSSVQTPHLPHTADSQTPSAGTDTQTFSGSAANA-KL-- 136  
 P23469 PTPRE\_HUMAN 1 ----- 0  
 P23470 PTPRG\_HUMAN 84 -----SPIDILDQYARVGEYQELQLDG 106  
 Q12913 PTPRJ\_HUMAN 366 AIQVF---DVT-AVNISATSLTLIWKVSDNESSNYTYK----IHVAGETDSSNLNVS 415  
 P28827 PTPRM\_HUMAN 171 -----AIDEVKVLG 179  
 Q13332 PTPRS\_HUMAN 716 DEDVPSAPPRKVEAEALNATAIRVLWR-----SPAPGRQHGIQYVHYVRMEG 765  
 Q93096 TP4A1\_HUMAN 1 ----- 0  
 Q12974 TP4A2\_HUMAN 1 ----- 0  
 O75365 TP4A3\_HUMAN 1 ----- 0

P10696 PPBN\_HUMAN 229 ----- 228  
 P18031 PTN1\_HUMAN 1 ----- 0  
 P17706 PTN2\_HUMAN 1 ----- 0  
 P29074 PTN4\_HUMAN 63 -----DLTEQDYFGLQLADDS---TDNPRW 84  
 P29350 PTN6\_HUMAN 1 ----- 0  
 P35236 PTN7\_HUMAN 1 ----- 0  
 P43378 PTN9\_HUMAN 1 ----- 0  
 Q06124 PTN11\_HUMAN 1 ----- 0  
 Q05209 PTN12\_HUMAN 1 ----- 0  
 Q12923 PTN13\_HUMAN 1237 -----GGI REGSL-----SS 1246  
 Q15678 PTN14\_HUMAN 44 QECLE-----AVAQRLELRETHYFGLWFLSKSQ---QARW 75  
 P18433 PTPRA\_HUMAN 1 ----- 0  
 P23467 PTPRB\_HUMAN 1043 EPATT-----KQHKFEDLTPGKYYIQLITVSGGLFSKEAQ 1078



|               |             |      |                                                               |      |
|---------------|-------------|------|---------------------------------------------------------------|------|
| <u>P08369</u> | PTPRE_HUMAN | 137  | NPPTGSAISDVPGERSTASTFPTDPVSPLETF--TFL-----SLAHSSAAL--PAR      | 180  |
| <u>P23470</u> | PTPRG_HUMAN | 107  | FD-----NESSNKTWMKNTGKTVAILLK-----DDYF-----VSGAGL--PGR         | 142  |
| <u>Q12913</u> | PTPRJ_HUMAN | 416  | EPR-----AVIPGLRSSTFYNIITVCPVLGDIEGTGPGF                       | 447  |
| <u>P28827</u> | PTPRM_HUMAN | 180  | HPCTRTPHFLRQNVNEVNAQGFATFQ-----                               | 205  |
| <u>Q13332</u> | PTPRS_HUMAN | 766  | AEARGPPRIKDVML---ADAQWETDDTAEYEMVITNLQPETAYSITVAAYTMKGD--GAR  | 820  |
| <u>Q93096</u> | TP4A1_HUMAN | 1    | -----                                                         | 0    |
| <u>Q12974</u> | TP4A2_HUMAN | 1    | -----                                                         | 0    |
| <u>Q75365</u> | TP4A3_HUMAN | 1    | -----                                                         | 0    |
|               |             |      |                                                               |      |
| <u>P10696</u> | PPBN_HUMAN  | 229  | -----                                                         | 228  |
| <u>P18031</u> | PTN1_HUMAN  | 1    | -----                                                         | 0    |
| <u>P17706</u> | PTN2_HUMAN  | 1    | -----                                                         | 0    |
| <u>P29074</u> | PTN4_HUMAN  | 85   | LDPNKP-----I-R--KQLKRGSPYSLNF-----RVKFFVSD                    | 113  |
| <u>P29350</u> | PTN6_HUMAN  | 1    | -----                                                         | 0    |
| <u>P35236</u> | PTN7_HUMAN  | 1    | -----                                                         | 0    |
| <u>P43378</u> | PTN9_HUMAN  | 1    | -----                                                         | 0    |
| <u>Q06124</u> | PTN11_HUMAN | 1    | -----                                                         | 0    |
| <u>Q05209</u> | PTN12_HUMAN | 1    | -----                                                         | 0    |
| <u>Q12923</u> | PTN13_HUMAN | 1247 | QDSRTES----ASLSQ-----SQVNGFFA-----SHLGDQTWQESQHG              | 1281 |
| <u>Q15678</u> | PTN14_HUMAN | 76   | VELEKPL----KK-----HLDKF-A-----NEPLLFFGVMFYV                   | 103  |
| <u>P18433</u> | PTPRA_HUMAN | 1    | -----                                                         | 0    |
| <u>P23467</u> | PTPRB_HUMAN | 1079 | TEGRTVP----AAVTD--LRITENSTRHLSFRWT-----ASEGELSWYNIFLYN        | 1121 |
| <u>P08575</u> | PTPRC_HUMAN | 184  | TSNTTITANTSDAYLNAS-ETTLSPSGSAVIST-----                        | 216  |
| <u>P23469</u> | PTPRE_HUMAN | 1    | -----                                                         | 0    |
| <u>P23470</u> | PTPRG_HUMAN | 143  | FKAE-----KVEFHGHSNGSAGSEHSINGRRF-----                         | 170  |
| <u>Q12913</u> | PTPRJ_HUMAN | 448  | LQVHTPP----VPVSD--FRVTVSTTEIGLAW-----SHDAESFQMHITQ--          | 488  |
| <u>P28827</u> | PTPRM_HUMAN | 206  | -----CSAIGR-----TVAGDRLWLQGDIVR                               | 226  |
| <u>Q13332</u> | PTPRS_HUMAN | 821  | SKPK-VV-VTKGAVLGRPTLSVQQTPEGSLLARWEPPAGTAE--DQVLGYRLQFGREDS-  | 875  |
| <u>Q93096</u> | TP4A1_HUMAN | 1    | -----                                                         | 0    |
| <u>Q12974</u> | TP4A2_HUMAN | 1    | -----                                                         | 0    |
| <u>Q75365</u> | TP4A3_HUMAN | 1    | -----                                                         | 0    |
|               |             |      |                                                               |      |
| <u>P10696</u> | PPBN_HUMAN  | 229  | -----                                                         | 228  |
| <u>P18031</u> | PTN1_HUMAN  | 1    | -----                                                         | 0    |
| <u>P17706</u> | PTN2_HUMAN  | 1    | -----                                                         | 0    |
| <u>P29074</u> | PTN4_HUMAN  | 114  | PNKLQEYTRYQY--FLQIKQDILTGR LPCSNTAALLASFVQSELDGYDQS-----      | 164  |
| <u>P29350</u> | PTN6_HUMAN  | 1    | -----                                                         | 0    |
| <u>P35236</u> | PTN7_HUMAN  | 1    | -----                                                         | 0    |
| <u>P43378</u> | PTN9_HUMAN  | 1    | -----                                                         | 0    |
| <u>Q06124</u> | PTN11_HUMAN | 1    | -----                                                         | 0    |
| <u>Q05209</u> | PTN12_HUMAN | 1    | -----                                                         | 0    |
| <u>Q12923</u> | PTN13_HUMAN | 1282 | PSPSVISKATE----KFTFTDSNQSKTKKPGIS----DVTDYSDRGGSDMDEATYSSS    | 1331 |
| <u>Q15678</u> | PTN14_HUMAN | 104  | PNVSWLQEQEATRYQYLVQKVDVLEGLRCLTDQVIRLAGLAVQADFQDYNQFDSQ----   | 159  |
| <u>P18433</u> | PTPRA_HUMAN | 1    | -----                                                         | 0    |
| <u>P23467</u> | PTPRB_HUMAN | 1122 | PDGNLQERAQVDPVLVQSFSFQNLQGRMYKMVIV-----T-----                 | 1156 |
| <u>P08575</u> | PTPRC_HUMAN | 217  | -TTIAT-----TPSK--PTCDEKYA---NIT---VD---YLYNKETKLF---          | 248  |
| <u>P23469</u> | PTPRE_HUMAN | 1    | -----                                                         | 0    |
| <u>P23470</u> | PTPRG_HUMAN | 171  | --PVEM-----QIFFYNPDDFDSFQTAISENRIIGAMA---IFFQVSPRDN---        | 211  |
| <u>Q12913</u> | PTPRJ_HUMAN | 489  | -EGAGNSRVEI--TTNQSIIGGLFPGTKYCFEIV-----P-----                 | 521  |
| <u>P28827</u> | PTPRM_HUMAN | 227  | DAPLKE-----IK--VTSSRRFIASFNVVNTTKRDA---GKYRCMIRTE---          | 265  |
| <u>Q13332</u> | PTPRS_HUMAN | 876  | -TPLAT-----LEF--PPSEDRYT---ASGVHKGAT---YVFRLAARSR---          | 910  |
| <u>Q93096</u> | TP4A1_HUMAN | 1    | -----                                                         | 0    |
| <u>Q12974</u> | TP4A2_HUMAN | 1    | -----                                                         | 0    |
| <u>Q75365</u> | TP4A3_HUMAN | 1    | -----                                                         | 0    |
|               |             |      |                                                               |      |
| <u>P10696</u> | PPBN_HUMAN  | 229  | -----MGTPDPEYPPDDYSQGGT---RLDGKNLVQEWLA                       | 258  |
| <u>P18031</u> | PTN1_HUMAN  | 1    | -----                                                         | 0    |
| <u>P17706</u> | PTN2_HUMAN  | 1    | -----                                                         | 0    |
| <u>P29074</u> | PTN4_HUMAN  | 165  | -----ENLSGYLS-DYSFIPNPQQ-----DFE---K--EIAKLHQHIGLSP           | 200  |
| <u>P29350</u> | PTN6_HUMAN  | 1    | -----                                                         | 0    |
| <u>P35236</u> | PTN7_HUMAN  | 1    | -----                                                         | 0    |
| <u>P43378</u> | PTN9_HUMAN  | 1    | -----                                                         | 0    |
| <u>Q06124</u> | PTN11_HUMAN | 1    | -----                                                         | 0    |
| <u>Q05209</u> | PTN12_HUMAN | 1    | -----                                                         | 0    |
| <u>Q12923</u> | PTN13_HUMAN | 1332 | QDHQTPKQESSSVNTSNKMN-FKTFSSPPKPGDIFEVE---LA-KN---DNSLGISV     | 1382 |
| <u>Q15678</u> | PTN14_HUMAN | 160  | -----DFLREYVLPMDLAL EEAVLEEL---TQ-KVAQEHKAHSGILP              | 198  |
| <u>P18433</u> | PTPRA_HUMAN | 1    | -----                                                         | 0    |
| <u>P23467</u> | PTPRB_HUMAN | 1157 | -----H--SGELS-NESFIFGRTPASVSHLR---GS-NRNTTDSLWFNWS            | 1196 |
| <u>P08575</u> | PTPRC_HUMAN | 249  | -----TAKLN---VNENV-ECGNN-----TCTNNEVHNL-                      | 273  |
| <u>P23469</u> | PTPRE_HUMAN | 1    | -----                                                         | 0    |
| <u>P23470</u> | PTPRG_HUMAN | 212  | -SALDPIIHGLKGVVHHEKETFLDPFVLRDLLPASLGSYYRYTGSLLTPPC-SEIVEIV   | 269  |
| <u>Q12913</u> | PTPRJ_HUMAN | 522  | -----KGPNGTEG-ASRTVCNRTVPSAVFDIH---V--VYVTTEMWLDWKS           | 562  |
| <u>P28827</u> | PTPRM_HUMAN | 266  | -----GGVGISNYAELV----VKEPPVPIAPPQLA-SVG-----ATYLWIQ           | 301  |
| <u>Q13332</u> | PTPRS_HUMAN | 911  | -----GGLGEEAAEVLV-----IPEDT-PRGHPQILEAAG---NASAGTVLLRWP       | 952  |
| <u>Q93096</u> | TP4A1_HUMAN | 1    | -----                                                         | 0    |
| <u>Q12974</u> | TP4A2_HUMAN | 1    | -----                                                         | 0    |
| <u>Q75365</u> | TP4A3_HUMAN | 1    | -----                                                         | 0    |
|               |             |      |                                                               |      |
| <u>P10696</u> | PPBN_HUMAN  | 259  | KH-----                                                       | 260  |
| <u>P18031</u> | PTN1_HUMAN  | 1    | -----                                                         | 0    |
| <u>P17706</u> | PTN2_HUMAN  | 1    | -----                                                         | 0    |
| <u>P29074</u> | PTN4_HUMAN  | 201  | AEA-----EFNYLNTARTLELYGVEF--HYAR--DQSNNEI-MIGVMSGGILLI        | 243  |
| <u>P29350</u> | PTN6_HUMAN  | 1    | -----                                                         | 0    |
| <u>P35236</u> | PTN7_HUMAN  | 1    | -----                                                         | 0    |
| <u>P43378</u> | PTN9_HUMAN  | 1    | -----                                                         | 0    |
| <u>Q06124</u> | PTN11_HUMAN | 1    | -----                                                         | 0    |
| <u>Q05209</u> | PTN12_HUMAN | 1    | -----                                                         | 0    |
| <u>Q12923</u> | PTN13_HUMAN | 1383 | TGG-----V-----NTSVRHGGIYV                                     | 1397 |
| <u>Q15678</u> | PTN14_HUMAN | 199  | AEA-----ELMYINEVERLDGFQGEI--FPVK--DNHGNVCV-HLGIFFMGIFV        | 241  |
| <u>P18433</u> | PTPRA_HUMAN | 1    | -----                                                         | 0    |
| <u>P23467</u> | PTPRB_HUMAN | 1197 | ASG-----DFDFY-ELI LYNPNTGK--ENWK--DKDLTEWRFGQLVPGRKYV         | 1239 |
| <u>P08575</u> | PTPRC_HUMAN | 274  | -----TEC--KN-----ASVSI SHNSCTAPDK--TLILDVPPGVEKF-----         | 306  |
| <u>P23469</u> | PTPRE_HUMAN | 1    | -----                                                         | 0    |
| <u>P23470</u> | PTPRG_HUMAN | 270  | FRRPVPI SYHQLEAF--YSIF--TTEQQ-----DHVKSVEYLRNNFRPQQLRH        | 313  |
| <u>Q12913</u> | PTPRJ_HUMAN | 563  | PDG-----ASEYVYHLVIESKHGNSH--TSTY--D---KAITLQGLIPGTYLN         | 603  |
| <u>P28827</u> | PTPRM_HUMAN | 302  | LN---ANSNGDGPVIVAREVEYCTASGS-----WNRQPVVDSTSYKIGHLDPPDTEYD    | 350  |
| <u>Q13332</u> | PTPRS_HUMAN | 953  | PV---PAE--RNGAIVKYTVAVREAGALGPARETELPAAAEPGAENALTQLQGLKPDATYD | 1007 |
| <u>Q93096</u> | TP4A1_HUMAN | 1    | -----                                                         | 0    |
| <u>Q12974</u> | TP4A2_HUMAN | 1    | -----                                                         | 0    |
| <u>Q75365</u> | TP4A3_HUMAN | 1    | -----                                                         | 0    |

|        |             |      |                                                           |      |
|--------|-------------|------|-----------------------------------------------------------|------|
| P10696 | PPBN_HUMAN  | 275  | -----QGARYVWNRTELLQ-----                                  | 274  |
| P18031 | PTN1_HUMAN  | 1    | -----                                                     | 0    |
| P17706 | PTN2_HUMAN  | 1    | -----                                                     | 0    |
| P29074 | PTN4_HUMAN  | 244  | YKNRVRM-----NTFPWLKIVKISF-----KCKQFFIQ                    | 271  |
| P29350 | PTN6_HUMAN  | 1    | -----                                                     | 0    |
| P35236 | PTN7_HUMAN  | 1    | -----                                                     | 0    |
| P43378 | PTN9_HUMAN  | 1    | -----                                                     | 0    |
| Q06124 | PTN11_HUMAN | 1    | -----                                                     | 0    |
| Q05209 | PTN12_HUMAN | 1    | -----                                                     | 0    |
| Q12923 | PTN13_HUMAN | 1398 | KAVIPQGAESDGRVHKGDRVLAVNGVSLLEGATHKQA-----VETLRNTGQVH     | 1446 |
| Q15678 | PTN14_HUMAN | 242  | RNRI-----GRQAVIYRWNDMGNITHNKSTILVELINKEETALFHTDDIENAKYISR | 293  |
| P18433 | PTPRA_HUMAN | 1    | -----                                                     | 0    |
| P23467 | PTPRB_HUMAN | 1240 | LWV-VTH-----SGDLSNKVTAE-----                              | 1256 |
| P08575 | PTPRC_HUMAN | 307  | -Q-----                                                   | 307  |
| P23469 | PTPRE_HUMAN | 1    | -----                                                     | 0    |
| P23470 | PTPRG_HUMAN | 314  | DRVVSKSA-----VRDSWNHDMTDFL-----EN                         | 336  |
| Q12913 | PTPRJ_HUMAN | 604  | ITI-SPE-----VDHWGDPNST-----                               | 620  |
| P28827 | PTPRM_HUMAN | 351  | ISVLLTRP-----GEG-----GTGSP-----GP                         | 368  |
| Q13332 | PTPRS_HUMAN | 1008 | LQVRAHT-----RR-----GPGPF-----SP                           | 1023 |
| Q93096 | TP4A1_HUMAN | 1    | -----                                                     | 0    |
| Q12974 | TP4A2_HUMAN | 1    | -----                                                     | 0    |
| Q75365 | TP4A3_HUMAN | 1    | -----                                                     | 0    |

|        |             |      |                                                             |      |
|--------|-------------|------|-------------------------------------------------------------|------|
| P10696 | PPBN_HUMAN  | 275  | -----                                                       | 274  |
| P18031 | PTN1_HUMAN  | 1    | -----                                                       | 0    |
| P17706 | PTN2_HUMAN  | 1    | -----                                                       | 0    |
| P29074 | PTN4_HUMAN  | 272  | --LRKELHES-----RETLGFMVNYRACKNLWKACVEHHTFFRLDRPLPPQKNFF     | 321  |
| P29350 | PTN6_HUMAN  | 1    | -----                                                       | 0    |
| P35236 | PTN7_HUMAN  | 1    | -----                                                       | 0    |
| P43378 | PTN9_HUMAN  | 1    | -----                                                       | 0    |
| Q06124 | PTN11_HUMAN | 1    | -----                                                       | 0    |
| Q05209 | PTN12_HUMAN | 1    | -----                                                       | 0    |
| Q12923 | PTN13_HUMAN | 1447 | LLLEKQSPSTKEHVPVTPQCTLSDQNAQGG-PEKVKKTTQVKDYSFVT---EENTFE   | 1501 |
| Q15678 | PTN14_HUMAN | 294  | LFATRHKFYK-----QNKICTEQ-----SNSPPPIRRQPTWSRSS-----LPRQQPYI  | 336  |
| P18433 | PTPRA_HUMAN | 1    | -----                                                       | 0    |
| P23467 | PTPRB_HUMAN | 1257 | ----SRTAPS-----PPSLMSFADIANTS LAITWKGPPDWDYND-----          | 1292 |
| P08575 | PTPRC_HUMAN | 308  | -----LH--D-C-----TQVEKAD-----TTICLKWKNIETF--TCDTQ---N       | 337  |
| P23469 | PTPRE_HUMAN | 1    | -----                                                       | 0    |
| P23470 | PTPRG_HUMAN | 337  | PLGT---EAS---KVCSSPPIHMKVQLNQ-----TALQVSWSQPETIY-HPPIMN-YM  | 382  |
| Q12913 | PTPRJ_HUMAN | 621  | ---AQYT-----RPSNVSNIDVSTNT-----TAATLSWQNFDD-----            | 650  |
| P28827 | PTPRM_HUMAN | 369  | ALRTR-TKCA---DPM-RGPRKLEVVVEKVS---RQITIRWEPFGYNVTRCHSYN-LT  | 416  |
| Q13332 | PTPRS_HUMAN | 1024 | PVRYR-TFLR---D-Q-VSPKFNKVKMIMK-----TSVLLSWEFPDNY--NSPT----- | 1064 |
| Q93096 | TP4A1_HUMAN | 1    | -----                                                       | 0    |
| Q12974 | TP4A2_HUMAN | 1    | -----                                                       | 0    |
| Q75365 | TP4A3_HUMAN | 1    | -----                                                       | 0    |

|        |             |      |                                                           |      |
|--------|-------------|------|-----------------------------------------------------------|------|
| P10696 | PPBN_HUMAN  | 275  | -----                                                     | 274  |
| P18031 | PTN1_HUMAN  | 1    | -----                                                     | 0    |
| P17706 | PTN2_HUMAN  | 1    | -----                                                     | 0    |
| P29074 | PTN4_HUMAN  | 322  | -----AHYFTLGSKFRYCGRTEV-----QSVQYGK                       | 346  |
| P29350 | PTN6_HUMAN  | 1    | -----                                                     | 0    |
| P35236 | PTN7_HUMAN  | 1    | -----                                                     | 0    |
| P43378 | PTN9_HUMAN  | 1    | -----                                                     | 0    |
| Q06124 | PTN11_HUMAN | 1    | -----                                                     | 0    |
| Q05209 | PTN12_HUMAN | 1    | -----                                                     | 0    |
| Q12923 | PTN13_HUMAN | 1502 | -----VKLFKNSSGLGFSFREDNLI-----PEQ                         | 1525 |
| Q15678 | PTN14_HUMAN | 337  | LPPVHVQCGEHYS-----ETHTSQDSIFHGNEEALYCNSHNSLDLNYLNGTV-TNG  | 386  |
| P18433 | PTPRA_HUMAN | 1    | -----                                                     | 0    |
| P23467 | PTPRB_HUMAN | 1293 | -----FELQWLPR---DALT---VFNPYNN                            | 1311 |
| P08575 | PTPRC_HUMAN | 338  | -ITYRFQCGNMI-----FDNKEIK---LENLEPEHEYKCDSEILYN-----NH     | 376  |
| P23469 | PTPRE_HUMAN | 1    | -----                                                     | 0    |
| P23470 | PTPRG_HUMAN | 383  | -ISYSWTKNEDE---KEKFTTKDSKDLKATISHVSPDSLYLFRVQAVCR-----ND  | 430  |
| Q12913 | PTPRJ_HUMAN | 651  | -----ASPTYSYCLLIEKAGN--SSNATQVVD                          | 676  |
| P28827 | PTPRM_HUMAN | 417  | -VHYCYQVGGQEQVREEVSWDTENSHPQHTITNLSPYTNVSVKLIILMNP-----EG | 466  |
| Q13332 | PTPRS_HUMAN | 1065 | --PYKIQYNGLT-----LDVDGRTTKKLITHLKPHTFYN-----F             | 1097 |
| Q93096 | TP4A1_HUMAN | 1    | -----                                                     | 0    |
| Q12974 | TP4A2_HUMAN | 1    | -----                                                     | 0    |
| Q75365 | TP4A3_HUMAN | 1    | -----                                                     | 0    |

|        |             |      |                                                          |      |
|--------|-------------|------|----------------------------------------------------------|------|
| P10696 | PPBN_HUMAN  | 275  | -----                                                    | 274  |
| P18031 | PTN1_HUMAN  | 1    | -----                                                    | 0    |
| P17706 | PTN2_HUMAN  | 1    | -----                                                    | 0    |
| P29074 | PTN4_HUMAN  | 347  | EKANKDRVFAFARSPSK-----PLARK-----LMDW-----EVVS---RNSISDDR | 383  |
| P29350 | PTN6_HUMAN  | 1    | -----                                                    | 0    |
| P35236 | PTN7_HUMAN  | 1    | -----                                                    | 0    |
| P43378 | PTN9_HUMAN  | 1    | -----                                                    | 0    |
| Q06124 | PTN11_HUMAN | 1    | -----                                                    | 0    |
| Q05209 | PTN12_HUMAN | 1    | -----                                                    | 0    |
| Q12923 | PTN13_HUMAN | 1526 | INASIVRVKFLFPQG-----PAAESGKIDVGDVILKVNGASLKGLSQQEVISALRG | 1579 |
| Q15678 | PTN14_HUMAN | 387  | SVCSVHVSNSLNCQSFSIQASPVSSNLSI-PGSDIMRAD-----YIPSHRHS     | 433  |
| P18433 | PTPRA_HUMAN | 1    | -----                                                    | 0    |
| P23467 | PTPRB_HUMAN | 1312 | RFSEGRIVYGLRPGR-----SYQFNVKTVSGDSW-----KTYSK-PIFGSVRTKPD | 1356 |
| P08575 | PTPRC_HUMAN | 377  | -KFT-----NASKI-----IKTDFGSPG                             | 393  |
| P23469 | PTPRE_HUMAN | 1    | -----                                                    | 0    |
| P23470 | PTPRG_HUMAN | 431  | -MRSDFSQTMFLFQA-----NTTRIFQGTTRI-----VKT--GVPT           | 461  |
| Q12913 | PTPRJ_HUMAN | 677  | IGITDATVTELIPGS-----SYTVEIFAQVGDGI-----KSLE--PGRKSFCTDPA | 720  |
| P28827 | PTPRM_HUMAN | 467  | -RKE-----SQELI-----VQTDDELPG                             | 483  |
| Q13332 | PTPRS_HUMAN | 1098 | -VLT-----N-----RGSS-                                     | 1105 |
| Q93096 | TP4A1_HUMAN | 1    | -----                                                    | 0    |
| Q12974 | TP4A2_HUMAN | 1    | -----                                                    | 0    |
| Q75365 | TP4A3_HUMAN | 1    | -----                                                    | 0    |

|        |             |      |                                                            |      |
|--------|-------------|------|------------------------------------------------------------|------|
| P10696 | PPBN_HUMAN  | 275  | -----                                                      | 274  |
| P18031 | PTN1_HUMAN  | 1    | -----                                                      | 0    |
| P17706 | PTN2_HUMAN  | 1    | -----                                                      | 0    |
| P29074 | PTN4_HUMAN  | 384  | ETQSLPSRSPPGTP-----NHRNSTFTQ---                            | 406  |
| P29350 | PTN6_HUMAN  | 1    | -----                                                      | 0    |
| P35236 | PTN7_HUMAN  | 1    | -----                                                      | 0    |
| P43378 | PTN9_HUMAN  | 1    | -----                                                      | 0    |
| Q06124 | PTN11_HUMAN | 1    | -----                                                      | 0    |
| Q05209 | PTN12_HUMAN | 1    | -----                                                      | 0    |
| Q12923 | PTN13_HUMAN | 1580 | EVFLLLRPPPGLPEIDTALLTPLQ--SPAQVL-----PNSKSDSSQP----        | 1621 |
| Q15678 | PTN14_HUMAN | 434  | -IIVPSYRPTPDYETVMRQMKRILHTDSQSLSLNLNIINTHAYNQPEDLVYSQP---- | 488  |

|        |             |             |      |                                                               |      |
|--------|-------------|-------------|------|---------------------------------------------------------------|------|
| P28447 | P18031      | PTPRB_HUMAN | 1357 | KIQNLWPRRG-NSTATAMOSWFELVLLG-P-----PDSDEFGYST                 | 1387 |
| P08572 | P18031      | P17706      | 394  | EPQIIFC-RSEAAHAGGVITWNP-----PQRSEFRHFTLCYIK                   | 428  |
| P23469 | PTPRE_HUMAN |             | 1    |                                                               | 0    |
| P23470 | P17706      | PTPRG_HUMAN | 462  | ASPASSA-DMAPIS-SGSSTWTSSGIPF-----SFVSMAT-GMG PSS              | 500  |
| Q12913 | P29074      | PTPRJ_HUMAN | 721  | SMASFDCVVPKPEPALV-LKWT-----C-----PPGANAGFEL----               | 752  |
| P28827 | P29350      | P17706      | 484  | AVPTESIQGSTFEE-KIFLQWREPTQTY-----GVITLYEITYKAVSSFDPEIDLSNQ    | 535  |
| Q13332 | P29350      | PTPRM_HUMAN | 1106 | -----LGGLQ-QTVTAWTAFNLLN-----GKPS-----VAPKPDADGFIMVYLP        | 1143 |
| Q93096 | TP4A1_HUMAN |             | 1    |                                                               | 0    |
| Q12974 | TP4A2_HUMAN |             | 1    |                                                               | 0    |
| Q75365 | TP4A3_HUMAN |             | 1    |                                                               | 0    |
| P10696 | PPBN_HUMAN  |             | 275  |                                                               | 274  |
| P18031 | PTN1_HUMAN  |             | 1    |                                                               | 0    |
| P17706 | PTN2_HUMAN  |             | 1    |                                                               | 0    |
| P29074 | PTN4_HUMAN  |             | 407  | ---EGTRLRPPSSVG--H-----LVDHMHVHTSP---                         | 428  |
| P29350 | PTN6_HUMAN  |             | 1    |                                                               | 0    |
| P35236 | PTN7_HUMAN  |             | 1    |                                                               | 0    |
| P43378 | PTN9_HUMAN  |             | 1    |                                                               | 0    |
| Q06124 | PTN11_HUMAN |             | 1    |                                                               | 0    |
| Q05209 | PTN12_HUMAN |             | 1    |                                                               | 0    |
| Q12923 | PTN13_HUMAN |             | 1622 | ----SCVEQSTSSDENEMSDKSKKQCKSPSRSDSYSSSGSGEDDLVTAPANISNST-WS   | 1676 |
| Q15678 | PTN14_HUMAN |             | 489  | ---EMRERHPYTVPYGPGVYSNKLVSQDQ-----RNPKNVVPVSKPGA              | 530  |
| P18433 | PTPRA_HUMAN |             | 12   | SG-LICVSA-----                                                | 19   |
| P23467 | PTPRB_HUMAN |             | 1388 | ---ECRKMDTQEVE--F---SRKLE-----K---EKSLLNIM-MLVP----           | 1417 |
| P08575 | PTPRC_HUMAN |             | 429  | ETEKDCLNLDKNLIKYDL-----QNLKPYTKYV                             | 456  |
| P23469 | PTPRE_HUMAN |             | 1    |                                                               | 0    |
| P23470 | PTPRG_HUMAN |             | 501  | SGSQATVA-----                                                 | 508  |
| Q12913 | PTPRJ_HUMAN |             | 753  | ---EVSSGAWNAT--H---LESCL-----SENGTEYRTEVT-YLNF----            | 785  |
| P28827 | PTPRM_HUMAN |             | 536  | SGRVSKLGNETH---FLF-----FGLYPGTTY                              | 560  |
| Q13332 | PTPRS_HUMAN |             | 1144 | DG-QSPVPV-----                                                | 1151 |
| Q93096 | TP4A1_HUMAN |             | 1    |                                                               | 0    |
| Q12974 | TP4A2_HUMAN |             | 1    |                                                               | 0    |
| Q75365 | TP4A3_HUMAN |             | 1    |                                                               | 0    |
| P10696 | PPBN_HUMAN  |             | 275  |                                                               | 274  |
| P18031 | PTN1_HUMAN  |             | 1    |                                                               | 0    |
| P17706 | PTN2_HUMAN  |             | 1    |                                                               | 0    |
| P29074 | PTN4_HUMAN  |             | 429  | ---SEV FV--NQR-----SP--SSTQANSIVLES---SPSQETPGDGKPPALPPKQSKK  | 472  |
| P29350 | PTN6_HUMAN  |             | 1    |                                                               | 0    |
| P35236 | PTN7_HUMAN  |             | 1    |                                                               | 0    |
| P43378 | PTN9_HUMAN  |             | 1    |                                                               | 0    |
| Q06124 | PTN11_HUMAN |             | 1    |                                                               | 0    |
| Q05209 | PTN12_HUMAN |             | 1    |                                                               | 0    |
| Q12923 | PTN13_HUMAN |             | 1677 | SALHQTLSNMVSAQASHHEAPKSQEDTICTMFYYP-QKIPNKPFEFEDSNPSPLPPDMPAG | 1735 |
| Q15678 | PTN14_HUMAN |             | 531  | SAISHT---VS-----TPELANMQLQSGHNYSTAHMLKN--YLFRRPPYP RPRPA      | 576  |
| P18433 | PTPRA_HUMAN |             | 20   | ---NNAT-----T-----VAP                                         | 27   |
| P23467 | PTPRB_HUMAN |             | 1418 | ---HKRYL--VSI-----KVQSAGMTSEV---VEDSTITMIDRPPPPHHRV N         | 1458 |
| P08575 | PTPRC_HUMAN |             | 457  | LSLHAYIIAKVQR-----NGSAMCH-----FTTKSAPP                        | 485  |
| P23469 | PTPRE_HUMAN |             | 1    |                                                               | 0    |
| P23470 | PTPRG_HUMAN |             | 509  | --SVWTSTLLAGLG-----FGGGGISS-----FPSTVWPTRLPTA                 | 541  |
| Q12913 | PTPRJ_HUMAN |             | 786  | ---STSYN--ISI-----TTVSCGKMAAP---TRNCTTGITDPPP--PDGSPN         | 824  |
| P28827 | PTPRM_HUMAN |             | 561  | FTIRASTA---KG-----FGPPATNQ-----FTTKISAPSPAY                   | 591  |
| Q13332 | PTPRS_HUMAN |             | 1152 | ---QSYFIVMVPL-----RKSRRG-Q-----FLTPLGSP                       | 1176 |
| Q93096 | TP4A1_HUMAN |             | 1    |                                                               | 0    |
| Q12974 | TP4A2_HUMAN |             | 1    |                                                               | 0    |
| Q75365 | TP4A3_HUMAN |             | 1    |                                                               | 0    |
| P10696 | PPBN_HUMAN  |             | 275  |                                                               | 274  |
| P18031 | PTN1_HUMAN  |             | 1    |                                                               | 0    |
| P17706 | PTN2_HUMAN  |             | 1    |                                                               | 0    |
| P29074 | PTN4_HUMAN  |             | 473  | -----NSWNQI-----HYSH--SQQDLES                                 | 489  |
| P29350 | PTN6_HUMAN  |             | 1    |                                                               | 0    |
| P35236 | PTN7_HUMAN  |             | 1    |                                                               | 0    |
| P43378 | PTN9_HUMAN  |             | 23   | TK-----QFLEEINKWTV-----QYNV--SPLSWNV                          | 46   |
| Q06124 | PTN11_HUMAN |             | 1    |                                                               | 2    |
| Q05209 | PTN12_HUMAN |             | 1    |                                                               | 0    |
| Q12923 | PTN13_HUMAN |             | 1736 | QSYQPQSEASSSSMDKYHIH-----HISEPTRQENWTPLKNDLENHLEDFEL          | 1783 |
| Q15678 | PTN14_HUMAN |             | 577  | TSTP-----DLASHRHK-----YVSGSPDLVTR-----KVQL                    | 604  |
| P18433 | PTPRA_HUMAN |             | 28   | -----SV-----                                                  | 29   |
| P23467 | PTPRB_HUMAN |             | 1459 | EK-----DVL-----ISK--SSINFTV-----                              | 1473 |
| P08575 | PTPRC_HUMAN |             | 486  | -----SQVWNM-----                                              | 491  |
| P23469 | PTPRE_HUMAN |             | 1    |                                                               | 0    |
| P23470 | PTPRG_HUMAN |             | 542  | ASASKQAARPVLATT---EALASPGPDGDSPTKDGEGTEEGEKDE-----            | 584  |
| Q12913 | PTPRJ_HUMAN |             | 825  | IT-----SVS-----HNSVKV-----                                    | 835  |
| P28827 | PTPRM_HUMAN |             | 592  | EL-----ETPLNQTDTNTVTMLKPAH-----SRGAPVSVYQI-----               | 623  |
| Q13332 | PTPRS_HUMAN |             | 1177 | -----E---DM-----                                              | 1179 |
| Q93096 | TP4A1_HUMAN |             | 1    |                                                               | 0    |
| Q12974 | TP4A2_HUMAN |             | 1    |                                                               | 0    |
| Q75365 | TP4A3_HUMAN |             | 1    |                                                               | 0    |
| P10696 | PPBN_HUMAN  |             | 275  |                                                               | 299  |
| P18031 | PTN1_HUMAN  |             | 1    |                                                               | 0    |
| P17706 | PTN2_HUMAN  |             | 1    |                                                               | 0    |
| P29074 | PTN4_HUMAN  |             | 490  | H---IN-----ETFDIP-S-----SPEK-P-----                           | 504  |
| P29350 | PTN6_HUMAN  |             | 1    | M-----VRFHFDLS-----                                           | 10   |
| P35236 | PTN7_HUMAN  |             | 1    |                                                               | 0    |
| P43378 | PTN9_HUMAN  |             | 47   | AVKFLMARKFDVLR-----IELFHYSYRETRRKEG---IVKLPHEEP---LR          | 88   |
| Q06124 | PTN11_HUMAN |             | 3    | S-----RRWFHPNIT-----                                          | 12   |
| Q05209 | PTN12_HUMAN |             | 1    |                                                               | 0    |
| Q12923 | PTN13_HUMAN |             | 1784 | EVELLITLIKSEKGLGFTVTGKNQRIGCVVHDIQDPKAS---DGR LKPGDRL---IK    | 1836 |
| Q15678 | PTN14_HUMAN |             | 605  | S-----VKTQEDSSPVVHQS LQEVSEPLTATKHGTVNK                       | 639  |
| P18433 | PTPRA_HUMAN |             | 30   | GITRLINSS-----TA-----EPVKEEAKT--SN-----                       | 51   |
| P23467 | PTPRB_HUMAN |             | 1474 | NCSWFSD---TNGA---VKYFTV--VVREADG---SDELKPEQQH-----            | 1507 |
| P08575 | PTPRC_HUMAN |             | 492  | TVSMTSDNS-----MHVK-----                                       | 504  |
| P23469 | PTPRE_HUMAN |             | 1    |                                                               | 0    |
| P23470 | PTPRG_HUMAN |             | 585  | K--SESEDG-----EREHE-EDGEKDSEKKEKSG-----                       | 610  |
| Q12913 | PTPRJ_HUMAN |             | 836  | KFSGFEA---SHGP---IKAYAVILT-----                               | 855  |
| P28827 | PTPRM_HUMAN |             | 624  | VVEEE-----RPRRTKKTTEI-----                                    | 639  |
| Q13332 | PTPRS_HUMAN |             | 1180 | DLEELIQDI-----SRLQ--RRLRHSRQLLEVPR-----                       | 1206 |
| Q93096 | TP4A1_HUMAN |             | 1    |                                                               | 0    |
| Q12974 | TP4A2_HUMAN |             | 1    |                                                               | 0    |
| Q75365 | TP4A3_HUMAN |             | 1    |                                                               | 0    |

|        |             |      |                                                               |      |
|--------|-------------|------|---------------------------------------------------------------|------|
| P10696 | PPBN_HUMAN  | 300  | DSTLDPS--LMEMTEAALLLSRN--PRGFLL-F-----VEGGRIDHGHE-----        | 340  |
| P18031 | PTN1_HUMAN  | 1    | -----                                                         | 0    |
| P17706 | PTN2_HUMAN  | 1    | -----                                                         | 0    |
| P29074 | PTN4_HUMAN  | 505  | -----TPN-GGIPH-----                                           | 512  |
| P29350 | PTN6_HUMAN  | 11   | -----GLDAETLL-----KGR-----GVHGSFLARPSRKNQG-----               | 37   |
| P35236 | PTN7_HUMAN  | 1    | -----                                                         | 0    |
| P43378 | PTN9_HUMAN  | 89   | SEILS-G-----KFTILNVR-----DPTGASIALFTAR-LHHPHKSVQH-VVL-----    | 128  |
| Q06124 | PTN11_HUMAN | 13   | -----GVEAENLL-----LTR-----GVDGSFLARPSKSNPG-----               | 39   |
| Q05209 | PTN12_HUMAN | 1    | -----                                                         | 0    |
| Q12923 | PTN13_HUMAN | 1837 | VNDTDVTV--NMHTDAVNLL-----RAASKTVRLVIGRVLELPRIPMLPHLLPDITLTCN  | 1889 |
| Q15678 | PTN14_HUMAN | 640  | RHSLEVMNMSVGRMEAMTLKSLHLPARRNTL-----REQGPPPEEGSGSHEVPQLP----- | 690  |
| P18433 | PTPRA_HUMAN | 52   | -----PTSS-----LTSLSVA-PT-----FSPNITLGPT-----                  | 74   |
| P23467 | PTPRB_HUMAN | 1508 | -----                                                         | 1510 |
| P08575 | PTPRC_HUMAN | 505  | -----C-----RPPRDRNGPH-----                                    | 515  |
| P23469 | PTPRE_HUMAN | 1    | -----                                                         | 0    |
| P23470 | PTPRG_HUMAN | 611  | -----VTHAAEERNQTEPSPTPS-----SPNRTAEGGHQTIPIGH-----            | 644  |
| Q12913 | PTPRJ_HUMAN | 856  | -----TGE-AGHPSADVLK---Y-----                                  | 869  |
| P28827 | PTPRM_HUMAN | 640  | -----LKCYVPV-IH-----FQNASLLNSQ-----                           | 658  |
| Q13332 | PTPRS_HUMAN | 1207 | -----PYIA---ARFSVLP-PT-----FHPGDQK-----                       | 1226 |
| Q93096 | TP4A1_HUMAN | 1    | -----                                                         | 0    |
| Q12974 | TP4A2_HUMAN | 1    | -----                                                         | 0    |
| Q75365 | TP4A3_HUMAN | 1    | -----                                                         | 0    |

|        |             |      |                                                              |      |
|--------|-------------|------|--------------------------------------------------------------|------|
| P10696 | PPBN_HUMAN  | 341  | -----SRAYRALTETIMFDDAIERAG-----QL----T-                      | 364  |
| P18031 | PTN1_HUMAN  | 1    | -----                                                        | 0    |
| P17706 | PTN2_HUMAN  | 1    | -----                                                        | 0    |
| P29074 | PTN4_HUMAN  | 513  | -----DNLVLIIRMKPDEN-----GR-----                              | 527  |
| P29350 | PTN6_HUMAN  | 38   | ---DFSL-----                                                 | 41   |
| P35236 | PTN7_HUMAN  | 1    | -----MVQAHG-----GR-----                                      | 8    |
| P43378 | PTN9_HUMAN  | 129  | -QALFYLLDRAVD-----SFETQRNGLVFIYDMC-----G-----                | 157  |
| Q06124 | PTN11_HUMAN | 40   | ---DFTL-----                                                 | 43   |
| Q05209 | PTN12_HUMAN | 1    | -----                                                        | 0    |
| Q12923 | PTN13_HUMAN | 1890 | KEELGFSLCGGHDSLVQVYVYISDINPRSVAAIEGNLQLLDVIHYVN----GVS----TQ | 1940 |
| Q15678 | PTN14_HUMAN | 691  | ---QYHHKKTFS-----DATMLIHSSSESEEEEEEPESVQPQIPM                | 726  |
| P18433 | PTPRA_HUMAN | 75   | -----                                                        | 74   |
| P23467 | PTPRB_HUMAN | 1511 | -SYLEYRHNASIR-----VYQT-----NYFASKCAEN-----PN-----            | 1538 |
| P08575 | PTPRC_HUMAN | 516  | -----                                                        | 515  |
| P23469 | PTPRE_HUMAN | 1    | -----                                                        | 0    |
| P23470 | PTPRG_HUMAN | 645  | -----                                                        | 644  |
| Q12913 | PTPRJ_HUMAN | 870  | -TYEDFK-KGASD-----TYVT-----Y-LIRTEEK-----GRS----QS           | 897  |
| P28827 | PTPRM_HUMAN | 659  | -----                                                        | 658  |
| Q13332 | PTPRS_HUMAN | 1227 | -----                                                        | 1226 |
| Q93096 | TP4A1_HUMAN | 1    | -----                                                        | 0    |
| Q12974 | TP4A2_HUMAN | 1    | -----                                                        | 0    |
| Q75365 | TP4A3_HUMAN | 1    | -----                                                        | 0    |

|        |             |      |                                                              |      |
|--------|-------------|------|--------------------------------------------------------------|------|
| P10696 | PPBN_HUMAN  | 365  | -SEEDTSLSLVTADH-S-----HVFSFGGYPLRG--SSIF                     | 394  |
| P18031 | PTN1_HUMAN  | 1    | -----                                                        | 0    |
| P17706 | PTN2_HUMAN  | 1    | -----                                                        | 0    |
| P29074 | PTN4_HUMAN  | 528  | ---FGFNVKGGYD-----QKMPVIVS-----                              | 545  |
| P29350 | PTN6_HUMAN  | 42   | ---SVRVGDQVTHI-----R-----                                    | 53   |
| P35236 | PTN7_HUMAN  | 9    | -SRAQPLTSLGGAAMTQ-----                                       | 24   |
| P43378 | PTN9_HUMAN  | 158  | -SNYANFELDLGKVLNLLKGAFPARLKKV-----                           | 186  |
| Q06124 | PTN11_HUMAN | 44   | -----SVRRNGAVTHI-----K-----                                  | 55   |
| Q05209 | PTN12_HUMAN | 1    | -----                                                        | 0    |
| Q12923 | PTN13_HUMAN | 1941 | GMTLEEVRALDMSLPSLVLKATRNDLPVVPSSKRSVAVSAKSTKNGNSYSVGS--CSQP  | 1998 |
| Q15678 | PTN14_HUMAN | 727  | LREKMEYSAQLQAALARIPNKP---PPEYPG-----PRKSVSNGALRQDQ--ASLP     | 772  |
| P18433 | PTPRA_HUMAN | 75   | -----YLTTVNSSDS--DNGTTRTASTNSIGI                             | 99   |
| P23467 | PTPRB_HUMAN | 1539 | -SNSKSFNIKLGAEMLGGKCDPTQKFCDG-----ERYHLEV-----EAGNT-----LVRN | 1569 |
| P08575 | PTPRC_HUMAN | 516  | -----                                                        | 531  |
| P23469 | PTPRE_HUMAN | 1    | -----                                                        | 0    |
| P23470 | PTPRG_HUMAN | 645  | -----EQDHTAVPTD--QTGGR-----RDAGP                             | 664  |
| Q12913 | PTPRJ_HUMAN | 898  | LSEVLKYEIDVGNES-----TTLGYNG-----                             | 920  |
| P28827 | PTPRM_HUMAN | 659  | -----YFAAEFPADSLQAAQP-----FTIGD                              | 680  |
| Q13332 | PTPRS_HUMAN | 1227 | -----QYG-----GFDNR--                                         | 1234 |
| Q93096 | TP4A1_HUMAN | 1    | -----                                                        | 0    |
| Q12974 | TP4A2_HUMAN | 1    | -----                                                        | 0    |
| Q75365 | TP4A3_HUMAN | 1    | -----                                                        | 0    |

|        |             |      |                                                        |      |
|--------|-------------|------|--------------------------------------------------------|------|
| P10696 | PPBN_HUMAN  | 395  | GLAPGKARDRKA-----YTVL-LYGNPG-----YV-----LKDGARPDVTESE  | 432  |
| P18031 | PTN1_HUMAN  | 1    | -----                                                  | 0    |
| P17706 | PTN2_HUMAN  | 1    | -----                                                  | 0    |
| P29074 | PTN4_HUMAN  | 546  | RVAPGTPADL-----CV-PRLNE---GD-----Q-----VVLI            | 569  |
| P29350 | PTN6_HUMAN  | 54   | IQNSGDFYDL-----YGGEKFATLTELVEYYTQQQGVLDQRDGTIIHLKYPL   | 100  |
| P35236 | PTN7_HUMAN  | 25   | -----                                                  | 24   |
| P43378 | PTN9_HUMAN  | 187  | -----LI                                                | 188  |
| Q06124 | PTN11_HUMAN | 56   | IQNTGDYDYDL-----YGGEKFATLAEVLQYQYMEHHGQLKEKNGDVIELKYPL | 102  |
| Q05209 | PTN12_HUMAN | 1    | -----                                                  | 0    |
| Q12923 | PTN13_HUMAN | 1999 | ALTPNDSFST-----VAGEEINEISYPKG---KCS-----TYQI           | 2029 |
| Q15678 | PTN14_HUMAN | 773  | PAM-----ARARV-----LR                                   | 782  |
| P18433 | PTPRA_HUMAN | 100  | TISPNGTWLP-DNQFTDART-EPWEGNSSTAAT                      | 130  |
| P23467 | PTPRB_HUMAN | 1570 | PLKPHTAYRI-----SI-RAFTQLFDED-----LKE                   | 1594 |
| P08575 | PTPRC_HUMAN | 532  | ESHKNCDFRVKDLQYSTDYTFKAYFH-NGDYPG                      | 563  |
| P23469 | PTPRE_HUMAN | 1    | -MEPLCPLLL--VGFSLPLA-RALRGNETTADS                      | 29   |
| P23470 | PTPRG_HUMAN | 665  | GLDPMVTSTQVPPT---ATEEQYAGSDPKRPEMPK-----KPMK           | 702  |
| Q12913 | PTPRJ_HUMAN | 921  | KLEPLGSYRA-----CV-AGFTNITFHPQ-----N-----KGLI           | 948  |
| P28827 | PTPRM_HUMAN | 681  | NKTYNGYWNTPLLPYK---SYRIFYQAASRANG-----                 | 710  |
| Q13332 | PTPRS_HUMAN | 1235 | GLEPGHRYVL---FVL---AVLQKSEPTFAA                        | 1259 |
| Q93096 | TP4A1_HUMAN | 1    | -----                                                  | 0    |
| Q12974 | TP4A2_HUMAN | 1    | -----                                                  | 0    |
| Q75365 | TP4A3_HUMAN | 1    | -----                                                  | 0    |

|        |             |      |                                                           |      |
|--------|-------------|------|-----------------------------------------------------------|------|
| P10696 | PPBN_HUMAN  | 433  | SGSPEYRQQS-----AVP-----                                   | 445  |
| P18031 | PTN1_HUMAN  | 1    | -----                                                     | 0    |
| P17706 | PTN2_HUMAN  | 1    | -----                                                     | 0    |
| P29074 | PTN4_HUMAN  | 570  | NGRD                                                      | 573  |
| P29350 | PTN6_HUMAN  | 101  | NCSD-PTSER-----WYHGMSGGQAET---LLQAK--GEPWTFVLVRESLSQPGDF  | 145  |
| P35236 | PTN7_HUMAN  | 25   | -----                                                     | 24   |
| P43378 | PTN9_HUMAN  | 189  | VGAP-----I-----WF--RVPY-----SIISL                         | 204  |
| Q06124 | PTN11_HUMAN | 103  | NCAD-PTSER-----WFHGHLSGKEAEK---LLTEK---GKHGSLVRESLSQHPGDF | 147  |
| Q05209 | PTN12_HUMAN | 1    | -----                                                     | 0    |
| Q12923 | PTN13_HUMAN | 2030 | KGSP-----NLTLPKESY---IQEDDIYDSSQAEVIQSLDQVDE              | 2067 |

018638 PTRRA\_HUMAN 783 HGPA--EKF-----PPSGNSBQK-RR---DPPAVNQMAGBSI--LVIVFIII 800  
P23467 PTPRB\_HUMAN 1595 FTKPLYSD-T-----FF--SLPITTESE---PLFGAIEGVSAGLFLIGMLVAVVAL 1639  
P08575 PTPRC\_HUMAN 564 -----EPF-----ILHHST-----SY---NSKALIAFLAF-----LIIVTSI 592  
P23469 PTPRE\_HUMAN 30 ---N--ETT-----TTSGP---PD-PG---ASQPLLAW-LLLPLL-LLLLLVLL 64  
P23470 PTPRG\_HUMAN 703 RGRDFSEDSRFITVNPAAEKNTSGMISR-APGRMEWIIPLIV--SALTFLVCL 752  
Q12913 PTPRJ\_HUMAN 949 DGAESYVFS-----RYSDAVSLPDQPG---VICGAVFGCIFGALVI---VTVGGF 993  
P28827 PTPRM\_HUMAN 711 --ETKIDCV---QVATKGAATPKVPE-PEKQTDHTVKIAGVIAGILL--FVIIFLGV 760  
Q13332 PTPRS\_HUMAN 1260 ---SPFSDPF-----QLNDPDPQPI--V---DGEEGLIWWIG-PVL--AVVFIICI 1299  
Q93096 TP4A1\_HUMAN 1 ----- 0  
Q12974 TP4A2\_HUMAN 1 ----- 0  
Q75365 TP4A3\_HUMAN 1 ----- 0

P10696 PPBN\_HUMAN 446 ----- 445  
P18031 PTN1\_HUMAN 1 ----- 0  
P17706 PTN2\_HUMAN 1 ----- 0  
P29074 PTN4\_HUMAN 574 -----I-----AEHHDQ----- 581  
P29350 PTN6\_HUMAN 146 VLS-VLSDQ-----PKAG-PGSPRLRVTHIKVMCEGGRYTVGGLET----- 183  
P35236 PTN7\_HUMAN 25 -----P-----PEKTPAKKHVRLQER----- 41  
P43378 PTN9\_HUMAN 205 -----LLK-----DKVRERIQIL----- 217  
Q06124 PTN11\_HUMAN 148 VLS-VRTGD-----DKGESNDGKSKVTHVMIRQCQLKYDVGGGER----- 186  
Q05209 PTN12\_HUMAN 1 ----- 0  
Q12923 PTN13\_HUMAN 2068 EAQNLLNEN-----NAAGY-----SCGPGLTKMNGKLSSE----- 2097  
Q15678 PTN14\_HUMAN 809 -----SEPDLTSVKERV----- 820  
P18433 PTPRA\_HUMAN 171 VLYMLRFKKYK-----QA-GSHSNFRL----- 192  
P23467 PTPRB\_HUMAN 1640 ---LTCRQ-----K-----VSHGREPSPARLSIR----- 1660  
P08575 PTPRC\_HUMAN 593 ALLVLYKIYDLHKK-----RSCNL----- 612  
P23469 PTPRE\_HUMAN 65 AAYFFRFRKQR-----KA-VVTSDDKMM----- 86  
P23470 PTPRG\_HUMAN 753 ILLIAVLVYWRGCKIKSKGFPFRFRFREP-----SSGERGEKGSRKCFQTAH----- 799  
Q12913 PTPRJ\_HUMAN 994 ---IFWRK-----K-----RKDAK---NNEVS----- 1009  
P28827 PTPRM\_HUMAN 761 V---LVMKKRKLAKRKE-TMSSTRQEMT-VMVNSMDKSYAEQGTNCDEAFSFMDDTHLN 815  
Q13332 PTPRS\_HUMAN 1300 VIAILLYKKNKPDSCR-KD-SEPRTKCLL----- 1325  
Q93096 TP4A1\_HUMAN 1 ----- 0  
Q12974 TP4A2\_HUMAN 1 ----- 0  
Q75365 TP4A3\_HUMAN 1 ----- 0

P10696 PPBN\_HUMAN 446 ----- 445  
P18031 PTN1\_HUMAN 1 ----- 0  
P17706 PTN2\_HUMAN 1 ----- 0  
P29074 PTN4\_HUMAN 582 -----VVLFIKASCE-RHSGELM-----LLVRPNAV 606  
P29350 PTN6\_HUMAN 184 -----FD-SLTDLVEHFKKTGIEEASGA-----EPI--CS 205  
P35236 PTN7\_HUMAN 42 -----RGSVALMLDVRSL---GA-V-----KIDLATWN 63  
P43378 PTN9\_HUMAN 218 -----KTSEVTOHLPRECLPENLGGYV----- 247  
Q06124 PTN11\_HUMAN 187 -----FD-SLTDLVEHYKKNPMVETLGT----- 208  
Q05209 PTN12\_HUMAN 1 ----- 0  
Q12923 PTN13\_HUMAN 2098 -----RTEDTDCDGSPLPEYFTEATKMGCEEYCEEKVKSES LIQKPQEKTDDEITWG 2152  
Q15678 PTN14\_HUMAN 821 -----KKEPKERPVSSEMFSLSDSIIER-----EMMIRNLEK----- 852  
P18433 PTPRA\_HUMAN 193 -----SNGRTD----- 199  
P23467 PTPRB\_HUMAN 1661 -----RDRPLSVHLNLGQK---GN-R-----KTS--CP 1682  
P08575 PTPRC\_HUMAN 613 -----DEQQL----- 618  
P23469 PTPRE\_HUMAN 87 -----PNGILEE----- 93  
P23470 PTPRG\_HUMAN 800 -----FYVEDSSSPRVVNPES----- 815  
Q12913 PTPRJ\_HUMAN 1010 -----FSQIKPKKSK----- 1019  
P28827 PTPRM\_HUMAN 816 GRSSVSSPSSFTMKTNTLTSVPSNY----- 840  
Q13332 PTPRS\_HUMAN 1326 -----NNADLAPHHPKD----- 1337  
Q93096 TP4A1\_HUMAN 1 ----- 0  
Q12974 TP4A2\_HUMAN 1 ----- 0  
Q75365 TP4A3\_HUMAN 1 ----- 0

P10696 PPBN\_HUMAN 446 ----- 445  
P18031 PTN1\_HUMAN 1 -----MEME---KEFE-- 8  
P17706 PTN2\_HUMAN 1 -----MPTTIE---REFE-- 10  
P29074 PTN4\_HUMAN 607 YDVVEEKLENEPD---FQYI--PEKAPLDSVHQ-----DDHS--LRE--SMIQLA 647  
P29350 PTN6\_HUMAN 206 -----FVYLRQP-----YY-ATRVNAADIE---NRVLEL 230  
P35236 PTN7\_HUMAN 64 VNTP-REVTLLH-----FLRTAGHPLTRWALQRQ----- 90  
P43378 PTN9\_HUMAN 248 FQFL-PQVNGHPDPFDEIILFSLPPALDWSVHV-----PGPHAMTIQ---ELVDYV 295  
Q06124 PTN11\_HUMAN 209 -----VLQKQP-----LN-TTRINAAEIE---SRVREL 233  
Q05209 PTN12\_HUMAN 1 -----MEQVEILRKFQIRV 14  
Q12923 PTN13\_HUMAN 2153 NDELPIERTNHEDSKDHSFLTNDLAVLPVVKV---LP-SGKYTGANLK---SVIRVL 2204  
Q15678 PTN14\_HUMAN 853 -----QKMAGLEAQKRPLMLAA---LNGLSVARVSGREEN-RVDATRVPMD---ERFRTL 900  
P18433 PTPRA\_HUMAN 200 -----VEPQS-----V-PLL---ARSP-----STNRKYPLPVDKLEEEINR- 232  
P23467 PTPRB\_HUMAN 1683 IKIN-Q-FEGH-----FMKLQ----- 1696  
P08575 PTPRC\_HUMAN 619 -----VERDD-----EKQLMNVPEIHADILLETYKR- 644  
P23469 PTPRE\_HUMAN 94 -----QEQR-----V-MLL---SRSP-----SGPKKYFPIPVHELEEEIRI- 126  
P23470 PTPRG\_HUMAN 816 -----I-----P-----IIPDDMEAIKPVKQFVKHIGE- 839  
Q12913 PTPRJ\_HUMAN 1020 -----LIRV-----ENFE---AYFKKQ 1033  
P28827 PTPRM\_HUMAN 841 ---YDPETHMA---SDTSSLVQSHTYKKREP---ADVPYQTGQLHPAIRVADLLQHTIQ- 891  
Q13332 PTPRS\_HUMAN 1338 ---PVEMRR-----I-NFQTPDGLRSPLREPGHFHESMLSHPIP IADMAEHTER- 1384  
Q93096 TP4A1\_HUMAN 1 ----- 0  
Q12974 TP4A2\_HUMAN 1 ----- 0  
Q75365 TP4A3\_HUMAN 1 ----- 0

P10696 PPBN\_HUMAN 446 ----- 445  
P18031 PTN1\_HUMAN 9 -----QIDKSGSWAAIYQDIR--HEASD-----FPCRVAKLPKNKNRNRVDSVPFDH 54  
P17706 PTN2\_HUMAN 11 -----ELDTRRWQPLYLEIR--NESH-----YPHRVAKFPENRRNRVDSVPYDH 56  
P29074 PTN4\_HUMAN 648 E---GLIT-GTVLTFQDFQLY---RKKPG-----MTMSCAKLPQNIKRNRYRDISPYDA 693  
P29350 PTN6\_HUMAN 231 NKKQSESED TAKAGFWEEFESLQKQEVKNL-----HQLEGGQREPKGNKRNKNIPLFDH 284  
P35236 PTN7\_HUMAN 91 -----PPSP-KQLEEEFL--K--IPSNF-----VSPEDLDIPGHASKDRYKTIPLNPQ 133  
P43378 PTN9\_HUMAN 296 N-----ARQK-QGIYEEYEDIR--RENVP-----GTFHCSMSPGNLEKNRYGDPVCLDQ 341  
Q06124 PTN11\_HUMAN 234 SKLAETTDKVKQGFWEFFETLQQQECKLL-----YSRKEGQRQENKKNRYKNIPLFDH 287  
Q05209 PTN12\_HUMAN 15 QAMKSPDHNGEDNIPARFEMRLR--RLSTKYRTEKIYPTATGEKEENVKRNRYKNIPLFDH 72  
Q12923 PTN13\_HUMAN 2205 R-----GLLDQGISPKLENLQ--ELKPL-----DQCLIGQTKENRRKNRYKNIPLYDA 2251  
Q15678 PTN14\_HUMAN 901 K-----KLEEGMVFEYEIQIP---KKNK-----GIFSTAALPENAEARSRIREVVPYEE 947  
P18433 PTPRA\_HUMAN 233 -----RMADDNKLFRFFNALP--ACPIQ-----ATCEAASKEENKRNRYVNIPLPYDH 179  
P23467 PTPRB\_HUMAN 1697 -----ADSN-YLLSKEYEELK--DVGRN-----QSCDIALPENRGKNRYNNIPLPYDA 274  
P08575 PTPRC\_HUMAN 645 -----KIADEGRFLAEFQSIP--RVFSK-----FPIKEARKPFNQKNRYVDILPYDY 691  
P23469 PTPRE\_HUMAN 127 -----RSADDCKQFRFFNSLP--SGHIQ-----GTFELANKEENRKNRYPNILPNDDH 173  
P23470 PTPRG\_HUMAN 840 -----LYSNHQHGFSDFEEVQ--RCTAD-----MNIATAEHSNHPENKHNRYINILAYDH 888  
Q12913 PTPRJ\_HUMAN 1034 Q-----ADSN-CGFAEYEDLK--LVGIS-----QPKYAAELAENRGNRYNNVLPYDI 1079  
P28827 PTPRM\_HUMAN 892 -----MKCAEYGFKEEYESFF--EQG-S-----APWDSAKKENRMKNRYGNIAYDH 937  
Q13332 PTPRS\_HUMAN 1385 -----LKANDSLKLSQYESID--PGQ-Q-----FTWEHSNLEVNKPNRYANVAYDH 1430  
Q93096 TP4A1\_HUMAN 1 ----- 0  
Q12974 TP4A2\_HUMAN 1 ----- 0



Q12923 PTN13\_HUMAN 2447 RHGMVQTERQVTECYQVTLVYLTRIQAEFEQKQ-QPOLLK----- 2487  
P18031 PTN1\_HUMAN 1160 RHMVQGTIRAGYKFFYQVLTQFLQNSRLT----- 1187  
P18433 PTPRA\_HUMAN 481 RCMVQVTDQMYYVFIYQALLLEHYLYGDETELEVTSLETHLQKI--YNKIPGTSNN-GLEEEF 537  
P23467 PTPRB\_HUMAN 1943 RVHMVQTECQYVYLHQVDRDLRARKLRSEQ----ENPLFPYIYENVNPEYH--R----- 1990  
P08575 PTPRC\_HUMAN 892 RCLMVQVEAQYILIHQALVEYNQFGETEVNLSLHPYLNHM--KKRDPPESEPS-PLAEAF 948  
P23469 PTPRE\_HUMAN 374 RPQMVQTDQMYYTFIYQALLLEHYLYGDETELDVSSLEKHLQTM--HGTTTHFDKI-GLEEEF 430  
P23470 PTPRG\_HUMAN 1099 RNYLVQTEEQYVFIHDALEALGKETEVSSNQLHSYVNSI--LIPGV-GGKT-RLEKQF 1154  
Q12913 PTPRJ\_HUMAN 1278 RPLMVQTEQYVFLNQCVDLIVRSQKDSKVDLIYQNTTAMTYENLAPVTTFGK----- 1331  
P28827 PTPRM\_HUMAN 1134 RVNMQVTEEQYVFIHDALEALCGLDTSVPASQVRSLYYDM--NKLDPQTNS-QKKEEF 1190  
Q13332 PTPRS\_HUMAN 1628 RNYMVQTEQYVFIHEALLEAVGCGNTEVPARSLYAIQKL--AQVEPGEHVT-GMELEF 1684  
Q93096 TP4A1\_HUMAN 69 ----- 68  
Q12974 TP4A2\_HUMAN 66 ----- 65  
Q75365 TP4A3\_HUMAN 69 ----- 68

P10696 PPBN\_HUMAN 533 ----- 532  
P18031 PTN1\_HUMAN 315 RILEPHN--GKCREFFPNHGW----VKEETQEDKDCPIKE---EKGSPNLAAPYGIES 363  
P17706 PTN2\_HUMAN 311 ---EKYN--GNR-----IG----LEEEKLTGDRCTGLS---SKM-----QDT 340  
P29074 PTN4\_HUMAN 927 ----- 926  
P29350 PTN6\_HUMAN 552 ASRT-----S-----SKHKEDV--YEN 566  
P35236 PTN7\_HUMAN 361 ----- 360  
P43378 PTN9\_HUMAN 594 ----- 593  
Q06124 PTN11\_HUMAN 562 SPLPCTPTPPCAEM-----REDSARV--YEN 586  
Q05209 PTN12\_HUMAN 330 QDSPPPKPP-RTRSCLEVGDAKEEILQPPEPHP--VPPIILTPSPSAFPTVTTVWQDNR 386  
Q12923 PTN13\_HUMAN 2486 ----- 2485  
Q15678 PTN14\_HUMAN 1188 ----- 1187  
P18433 PTPRA\_HUMAN 538 KKLTSTIK--IQNDKM---RTG----NLPANM-----KKNRVLQIIPYEFNR 574  
P23467 PTPRB\_HUMAN 1991 -----DPV--YSR 1996  
P08575 PTPRC\_HUMAN 949 QRLPSYR--SWRTQ---HIG---NQEENK-----SKNRNSNVIPYDYNR 984  
P23469 PTPRE\_HUMAN 431 RKLTVNR--IMKENM---RTG----NLPANM-----KKARVIQIIPYDFNR 467  
P23470 PTPRG\_HUMAN 1155 KLVTCQN--AKYVEC---FSA----QKECNK-----EKNRNSVVPSEAR 1191  
Q12913 PTPRJ\_HUMAN 1332 -----TNG--YIA 1337  
P28827 PTPRM\_HUMAN 1191 RTLMVMTPLRVEDC--SIA----LPRNH-----EKNRCMDILPPDRCL 1229  
Q13332 PTPRS\_HUMAN 1685 KRLANSK--AHTSRF---ISA----NLPCNK-----FKNRLVNIIMPYESTR 1721  
Q93096 TP4A1\_HUMAN 69 ----- 68  
Q12974 TP4A2\_HUMAN 66 ----- 65  
Q75365 TP4A3\_HUMAN 69 ----- 68

P10696 PPBN\_HUMAN 533 ----- 532  
P18031 PTN1\_HUMAN 364 MSQ--D-----TEVRSRVVGGSLRGAQAASP-----AK 389  
P17706 PTN2\_HUMAN 341 MEENSE-----SALRKRI----REDRKATT-----AQ 363  
P29074 PTN4\_HUMAN 927 ----- 926  
P29350 PTN6\_HUMAN 567 LHTKNKREEKVKKQRSAD--KEKSKGSLKRK----- 595  
P35236 PTN7\_HUMAN 361 ----- 360  
P43378 PTN9\_HUMAN 594 ----- 593  
Q06124 PTN11\_HUMAN 587 VGLMQQKKS-----FR----- 597  
Q05209 PTN12\_HUMAN 387 YHPKPVLMHVSSEQHSAD-----LNRNYSKSTELPGKNESTIEQIDKLERLNSF 436  
Q12923 PTN13\_HUMAN 2486 ----- 2485  
Q15678 PTN14\_HUMAN 1188 ----- 1187  
P18433 PTPRA\_HUMAN 575 VIIPVK-----RGEENTDYVNASFIDGYRQKD-----SY 603  
P23467 PTPRB\_HUMAN 1997 H----- 1997  
P08575 PTPRC\_HUMAN 985 VPLKHELEMSKESEHDSDESSDDSDSEEPSKYINASFIMSYWKPE-----YM 1032  
P23469 PTPRE\_HUMAN 468 VILSMK-----RGQEYTDYINASFIDGYRQKD-----YF 496  
P23470 PTPRG\_HUMAN 1192 VGLAPL-----PGMGKTDYINASYIMGYRSN-----EF 1220  
Q12913 PTPRJ\_HUMAN 1338 ----- 1337  
P28827 PTPRM\_HUMAN 1230 PFLITI-----DGESSNYINAALMDSYKQPS-----AF 1257  
Q13332 PTPRS\_HUMAN 1722 VCLQPI-----RGVEGSDYINASFIDGYRQK-----AY 1750  
Q93096 TP4A1\_HUMAN 69 ----- 68  
Q12974 TP4A2\_HUMAN 66 ----- 65  
Q75365 TP4A3\_HUMAN 69 ----- 68

P10696 PPBN\_HUMAN 533 ----- 532  
P18031 PTN1\_HUMAN 390 ---GEPSSL-PEKDEDHALSYWKPFLVNMCVATVLT-----GAYLCYRFLFNS 433  
P17706 PTN2\_HUMAN 364 KVQMQKQRLNENERKRKRWLWQPILTKMGFMVILV-----GAFVGTLLFFQQ 412  
P29074 PTN4\_HUMAN 927 ----- 926  
P29350 PTN6\_HUMAN 596 ----- 595  
P35236 PTN7\_HUMAN 361 ----- 360  
P43378 PTN9\_HUMAN 594 ----- 593  
Q06124 PTN11\_HUMAN 598 ----- 597  
Q05209 PTN12\_HUMAN 437 ETKKV-PL--QE----GPKSFGDNTLLNRGHAIKIKSASPCIADKISKPELSSDLNVGD 489  
Q12923 PTN13\_HUMAN 2486 ----- 2485  
Q15678 PTN14\_HUMAN 1188 ----- 1187  
P18433 PTPRA\_HUMAN 604 IASQG-PL--LH----TIEDFWRMIEWKSCSIVMLT-----ELEERGQEKCAQYWPSD 650  
P23467 PTPRB\_HUMAN 1998 ----- 1997  
P08575 PTPRC\_HUMAN 1033 IAAQG-PL--KE----TIGDFWQMFQRKVKVIVMLT-----ELKHGDQEIQAQYWG-E 1078  
P23469 PTPRE\_HUMAN 497 IATQG-PL--AH----TVEDFWRMIEWKSHIVMLT-----EVQEREQDKCYQYWPE 543  
P23470 PTPRG\_HUMAN 1221 IITQH-PL--PH----TKDFWRMIWDHNAQIIVMLP-----DNQSLA-EDEFVYWPSPR 1266  
Q12913 PTPRJ\_HUMAN 1338 ----- 1337  
P28827 PTPRM\_HUMAN 1258 IVTQH-PL--PN----TVKDFWRLVLDYHCTSVVMLN-----DVDP--AQLCPQYWPEN 1302  
Q13332 PTPRS\_HUMAN 1751 IATQG-PL--AE----TTEDFWRLWENNSTIVVMLT-----KLREMGREKCHQYWPAE 1797  
Q93096 TP4A1\_HUMAN 69 ----- 68  
Q12974 TP4A2\_HUMAN 66 ----- 65  
Q75365 TP4A3\_HUMAN 69 ----- 68

P10696 PPBN\_HUMAN 533 ----- 532  
P18031 PTN1\_HUMAN 434 NT----- 435  
P17706 PTN2\_HUMAN 413 NAL----- 415  
P29074 PTN4\_HUMAN 927 ----- 926  
P29350 PTN6\_HUMAN 596 ----- 595  
P35236 PTN7\_HUMAN 361 ----- 360  
P43378 PTN9\_HUMAN 594 ----- 593  
Q06124 PTN11\_HUMAN 598 ----- 597  
Q05209 PTN12\_HUMAN 490 TSQNSCVDCSVTQSN-----KVSVPPEESQNS-----DTPPR 522  
Q12923 PTN13\_HUMAN 2486 ----- 2485  
Q15678 PTN14\_HUMAN 1188 ----- 1187  
P18433 PTPRA\_HUMAN 651 GLV-SYGDITVELKK-----EECESYTVRDLLVTNT-----RENKSRQIRQFHHFGWPE 699  
P23467 PTPRB\_HUMAN 1998 ----- 1997  
P08575 PTPRC\_HUMAN 1079 GKQ-TYGDIEVDLKD----TDKSSTYTLRVFELRHS----KRKDSRTVYQYQYTNWSV 1127  
P23469 PTPRE\_HUMAN 544 GSV-THGEITIEIKN-----DTLSEAISIRDFLVTLNQPPARQEEQVVRVRFHHFGWPE 597  
P23470 PTPRG\_HUMAN 1267 EESMNCFAFVTLISKDRCLCSNEEQIHHDFILEAT-----QDDYVLEVRHFQCPKWPEN 1321  
Q12913 PTPRJ\_HUMAN 1338 ----- 1337  
P28827 PTPRM\_HUMAN 1303 GVH-RHGPIQVEFVS-----ADLEEDIISRIFRIYNA-----ARPQDGYRMVQFQFLGWPM 1353  
Q13332 PTPRS\_HUMAN 1798 RSA-RYQYFVDPMA-----EYMPQYILREFKVTD-----RDGQSRTRVRFQFTDWPE 1846  
Q93096 TP4A1\_HUMAN 69 ----- 70

|        |             |      |                                                              |      |
|--------|-------------|------|--------------------------------------------------------------|------|
| P10696 | PPBN_HUMAN  | 533  | -----                                                        | 532  |
| P18031 | PTN1_HUMAN  | 436  | -----                                                        | 435  |
| P17706 | PTN2_HUMAN  | 416  | -----                                                        | 415  |
| P29074 | PTN4_HUMAN  | 927  | -----                                                        | 926  |
| P29350 | PTN6_HUMAN  | 596  | -----                                                        | 595  |
| P35236 | PTN7_HUMAN  | 361  | -----                                                        | 360  |
| P43378 | PTN9_HUMAN  | 594  | -----                                                        | 593  |
| Q06124 | PTN11_HUMAN | 598  | -----                                                        | 597  |
| Q05209 | PTN12_HUMAN | 523  | PDRLPLDEKGHVTSF-----HGPENAIPIPDLSEGNSSDI-----                | 558  |
| Q12923 | PTN13_HUMAN | 2486 | -----                                                        | 2485 |
| Q15678 | PTN14_HUMAN | 1188 | -----                                                        | 1187 |
| P18433 | PTPRA_HUMAN | 700  | V-GIPSDGKGMISIIAAVQKQQQ-----SG-NHPITVHCSAGAGRTGTFICALSTVL    | 749  |
| P23467 | PTPRB_HUMAN | 1998 | -----                                                        | 1997 |
| P08575 | PTPRC_HUMAN | 1128 | E-QLPAEPKELISMIQVVKQKLPQKNSSEGNKHHKSTPLLIHCRDGSQQTGFICALLNLL | 1186 |
| P23469 | PTPRE_HUMAN | 598  | I-GIPAEKGMIDLIAAVQKQQQ-----TG-NHPITVHCSAGAGRTGTFIALSNIL      | 647  |
| P23470 | PTPRG_HUMAN | 1322 | PDAPISSTFELINVIK---EE-----ALTRDGPITVHDEYGAVSAGMLCALTTLS      | 1368 |
| Q12913 | PTPRJ_HUMAN | 1338 | -----                                                        | 1337 |
| P28827 | PTPRM_HUMAN | 1354 | YRDTPVSKRSFLKLIROVDKWQEEYN-----GGEGRTVVHCLNGGGRSGTFFCAISIVC  | 1406 |
| Q13332 | PTPRS_HUMAN | 1847 | Q-GVPKSGEGFIDFIGQVHKTEQ-----FGQDGPISVHCSAGVGRIGVITLISIVL     | 1897 |
| Q93096 | TP4A1_HUMAN | 71   | DDGAPPSNIQVDDWLSLVKIKFRE-----EPGCCIAVHCVAGLGRAPVLVALALIE     | 121  |
| Q12974 | TP4A2_HUMAN | 68   | DDGAPPPNIQVDDWLSLVKIKFRE-----EPGCCVAVHCVAGLGRAPVLVALALIE     | 118  |
| Q75365 | TP4A3_HUMAN | 71   | DDGAPPPGKVVEDWLSLVKAKFCE-----APGSCVAVHCVAGLGRAPVLVALALIE     | 121  |

|        |             |      |                                                             |      |
|--------|-------------|------|-------------------------------------------------------------|------|
| P10696 | PPBN_HUMAN  | 533  | -----                                                       | 532  |
| P18031 | PTN1_HUMAN  | 436  | -----                                                       | 435  |
| P17706 | PTN2_HUMAN  | 416  | -----                                                       | 415  |
| P29074 | PTN4_HUMAN  | 927  | -----                                                       | 926  |
| P29350 | PTN6_HUMAN  | 596  | -----                                                       | 595  |
| P35236 | PTN7_HUMAN  | 361  | -----                                                       | 360  |
| P43378 | PTN9_HUMAN  | 594  | -----                                                       | 593  |
| Q06124 | PTN11_HUMAN | 598  | -----                                                       | 597  |
| Q05209 | PTN12_HUMAN | 559  | -----NYQTRKTVSLTPSPTTQVETPDLVDHD-NTSPLFRTPLSFTNPLHSDSD      | 607  |
| Q12923 | PTN13_HUMAN | 2486 | -----                                                       | 2485 |
| Q15678 | PTN14_HUMAN | 1188 | -----                                                       | 1187 |
| P18433 | PTPRA_HUMAN | 750  | ERVKAEGILDVDFQTVKSL-----RLQRPHMVQTLQYEFQYKVVQYVIDAFSD----   | 797  |
| P23467 | PTPRB_HUMAN | 1998 | -----                                                       | 1997 |
| P08575 | PTPRC_HUMAN | 1187 | ESAETEEVVDIFQVVKAL-----RKARPGMVSTFEQYQFLYDVVIASITYPAQNG---- | 1234 |
| P23469 | PTPRE_HUMAN | 648  | ERVKAEGLLDVFQAVKSL-----RLQRPHMVQTLQYEFQYKVVQDFIDIFSD----    | 695  |
| P23470 | PTPRG_HUMAN | 1369 | QQLLENENAVDVFQVAKMI-----NLMRPGVFTDIEQYQFIYKAMLSLVSTKEN----  | 1416 |
| Q12913 | PTPRJ_HUMAN | 1338 | -----                                                       | 1337 |
| P28827 | PTPRM_HUMAN | 1407 | EMLRHQRTVDVFAVKTLL-----RNNKPNMVDLLDQYKFCYEVALEYLNSG-----    | 1452 |
| Q13332 | PTPRS_HUMAN | 1898 | ERMRYEGVVDFIQTVKML-----RTQRPMVQTEDEYQFCYQAALYLGSEFDH----    | 1945 |
| Q93096 | TP4A1_HUMAN | 122  | GMKMYEDAVQFIRQKRRGAFNS-----KQLLYLEKYRPMKMR--LRFKDSNGHRNN-   | 169  |
| Q12974 | TP4A2_HUMAN | 119  | CGMKYEDAVQFIRQKRRGAFNS-----KQLLYLEKYRPMKMR--LRFKDSNGH--     | 163  |
| Q75365 | TP4A3_HUMAN | 122  | SGMKYEDATQFIRQKRRGAINS-----KQLTYLEKYRPMKMR--LRFKDPHTHKTR-   | 169  |

|        |             |      |                                                               |      |
|--------|-------------|------|---------------------------------------------------------------|------|
| P10696 | PPBN_HUMAN  | 533  | -----                                                         | 532  |
| P18031 | PTN1_HUMAN  | 436  | -----                                                         | 435  |
| P17706 | PTN2_HUMAN  | 416  | -----                                                         | 415  |
| P29074 | PTN4_HUMAN  | 927  | -----                                                         | 926  |
| P29350 | PTN6_HUMAN  | 596  | -----                                                         | 595  |
| P35236 | PTN7_HUMAN  | 361  | -----                                                         | 360  |
| P43378 | PTN9_HUMAN  | 594  | -----                                                         | 593  |
| Q06124 | PTN11_HUMAN | 598  | -----                                                         | 597  |
| Q05209 | PTN12_HUMAN | 608  | SDERNSDGAVTQNKTNISTASATVSAATSTESISTRKVLPMSEIARHNIAGTTHSGAEKDV | 667  |
| Q12923 | PTN13_HUMAN | 2486 | -----                                                         | 2485 |
| Q15678 | PTN14_HUMAN | 1188 | -----                                                         | 1187 |
| P18433 | PTPRA_HUMAN | 798  | -----YAN-----                                                 | 800  |
| P23467 | PTPRB_HUMAN | 1998 | -----                                                         | 1997 |
| P08575 | PTPRC_HUMAN | 1235 | -----QVKKNNHQ-EDKI-----                                       | 1246 |
| P23469 | PTPRE_HUMAN | 696  | -----YAN-----                                                 | 698  |
| P23470 | PTPRG_HUMAN | 1417 | -----GNGPMTVDKNGAV-----                                       | 1429 |
| Q12913 | PTPRJ_HUMAN | 1338 | -----                                                         | 1337 |
| P28827 | PTPRM_HUMAN | 1453 | -----                                                         | 1452 |
| Q13332 | PTPRS_HUMAN | 1946 | -----YAT-----                                                 | 1948 |
| Q93096 | TP4A1_HUMAN | 170  | -----CCIQ-----                                                | 173  |
| Q12974 | TP4A2_HUMAN | 164  | -----CCVQ-----                                                | 167  |
| Q75365 | TP4A3_HUMAN | 170  | -----CCVM-----                                                | 173  |

|        |             |      |                                                               |      |
|--------|-------------|------|---------------------------------------------------------------|------|
| P10696 | PPBN_HUMAN  | 533  | -----                                                         | 532  |
| P18031 | PTN1_HUMAN  | 436  | -----                                                         | 435  |
| P17706 | PTN2_HUMAN  | 416  | -----                                                         | 415  |
| P29074 | PTN4_HUMAN  | 927  | -----                                                         | 926  |
| P29350 | PTN6_HUMAN  | 596  | -----                                                         | 595  |
| P35236 | PTN7_HUMAN  | 361  | -----                                                         | 360  |
| P43378 | PTN9_HUMAN  | 594  | -----                                                         | 593  |
| Q06124 | PTN11_HUMAN | 598  | -----                                                         | 597  |
| Q05209 | PTN12_HUMAN | 668  | DVSEDSPPPLPERTPESFLVLAHEHNTPVRSWSELQSQSERSEKQKSEGLITSENEKCDHP | 727  |
| Q12923 | PTN13_HUMAN | 2486 | -----                                                         | 2485 |
| Q15678 | PTN14_HUMAN | 1188 | -----                                                         | 1187 |
| P18433 | PTPRA_HUMAN | 801  | -FK-----                                                      | 802  |
| P23467 | PTPRB_HUMAN | 1998 | -----                                                         | 1997 |
| P08575 | PTPRC_HUMAN | 1247 | EFDNEVD-----K-----VKQDANCVNP                                  | 1264 |
| P23469 | PTPRE_HUMAN | 699  | -FK-----                                                      | 700  |
| P23470 | PTPRG_HUMAN | 1430 | LIADESD-----P-----                                            | 1437 |
| Q12913 | PTPRJ_HUMAN | 1338 | -----                                                         | 1337 |
| P28827 | PTPRM_HUMAN | 1453 | -----                                                         | 1452 |
| Q13332 | PTPRS_HUMAN | 1949 | -----                                                         | 1948 |
| Q93096 | TP4A1_HUMAN | 174  | -----                                                         | 173  |
| Q12974 | TP4A2_HUMAN | 168  | -----                                                         | 167  |
| Q75365 | TP4A3_HUMAN | 174  | -----                                                         | 173  |

|        |            |     |       |     |
|--------|------------|-----|-------|-----|
| P10696 | PPBN_HUMAN | 533 | ----- | 532 |
| P18031 | PTN1_HUMAN | 436 | ----- | 435 |
| P17706 | PTN2_HUMAN | 416 | ----- | 415 |
| P29074 | PTN4_HUMAN | 927 | ----- | 926 |
| P29350 | PTN6_HUMAN | 596 | ----- | 595 |
| P35236 | PTN7_HUMAN | 361 | ----- | 360 |
| P43378 | PTN9_HUMAN | 594 | ----- | 593 |



|               |             |      |                                                         |      |
|---------------|-------------|------|---------------------------------------------------------|------|
| <u>Q06124</u> | PTN11_HUMAN | 528  | AGGIHYEMCIECPPTFSDKREQISE-NPTEATDIGFGNRCGKPKGPRDPPSEWT= | 580  |
| <u>Q12923</u> | PTN13_HUMAN | 2486 | -----                                                   | 2485 |
| <u>Q15678</u> | PTN14_HUMAN | 1188 | -----                                                   | 1187 |
| <u>P18433</u> | PTPRA_HUMAN | 803  | -----                                                   | 802  |
| <u>P23467</u> | PTPRB_HUMAN | 1998 | -----                                                   | 1997 |
| <u>P08575</u> | PTPRC_HUMAN | 1265 | LGAPE-----KLPEAKEQAEGSEPTSGT-EGPEH---SVNGPASPALNQGS     | 1306 |
| <u>P23469</u> | PTPRE_HUMAN | 701  | -----                                                   | 700  |
| <u>P23470</u> | PTPRG_HUMAN | 1438 | AESME-----SLV-----                                      | 1445 |
| <u>Q12913</u> | PTPRJ_HUMAN | 1338 | -----                                                   | 1337 |
| <u>P28827</u> | PTPRM_HUMAN | 1453 | -----                                                   | 1452 |
| <u>Q13332</u> | PTPRS_HUMAN | 1949 | -----                                                   | 1948 |
| <u>Q93096</u> | TP4A1_HUMAN | 174  | -----                                                   | 173  |
| <u>Q12974</u> | TP4A2_HUMAN | 168  | -----                                                   | 167  |
| <u>O75365</u> | TP4A3_HUMAN | 174  | -----                                                   | 173  |

You may add additional sequences to this alignment (in FASTA format)

## Tree

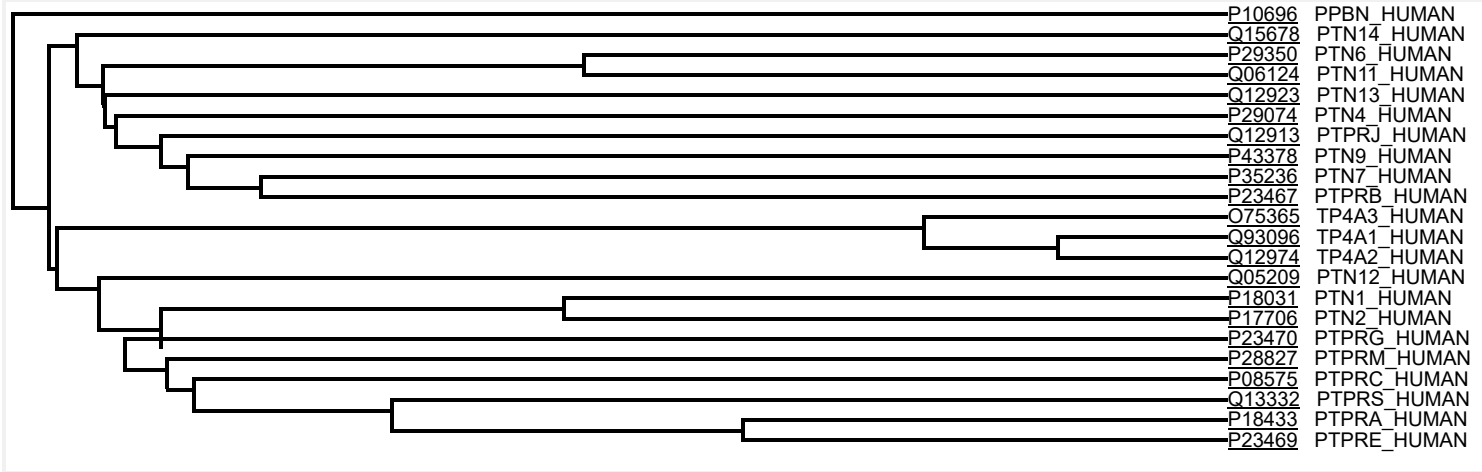

Highlight Taxonomy

## Result information

### Query sequences

>sp|P10696|PPBN\_HUMAN Alkaline phosphatase, placental-like OS=Homo sapiens OX=9606 GN=ALPPL2 PE=2 SV=4

```
MQGPWVLLLLLGLRLQLSLGIIPVEEENPDFWNRQAAEALGAAKLLQPAQTAAKNLIIFLG
DGMGVSTVTAARILKGGQKDKLGPETFLAMDRFPYVALSKTYSVDKHPVDSGATATAYLC
GVKGNFQITGLSAAARFNQCNTTRGNEVISVMNRAKAGKSVGVVTTTRVQHASPAGAYA
HTVNRNWSYDADVPASARQEGCQDIATQLISNMDIDVILGGGRKYMFPMPGTPDPEYDDY
SQGGTRLDGKNLVQEWLAKHQGARYVWNRTELLQASLDPSVTHLMGLFEPGDMKYEIHRD
STLDPSLMEATEAALLLLSRNPRGFFLFVEGGRIDHGHESRAYRALTEIMFDDAIERA
GQLTSEEDTLSLVTADHSVHVSFGGYPLRGSSIFGLAPGKARDRKAYTVLLYGNGPGYVL
KDGARPDVTESESGSPEYRQQSAPLDGETHAGEDVAVFARGPQAHLVHGVQEQTFFIAHV
MAFAACLEPYTACDLAPRAGTTDAAHPGSPVVPALLPLLAGTLLLLGTATAP
```

>sp|P18031|PTN1\_HUMAN Tyrosine-protein phosphatase non-receptor type 1 OS=Homo sapiens OX=9606 GN=PTPN1 PE=1 SV=1

```
MEMEKFEFEQIDKSGSWAAIYQDIRHEASDFPCRVAKLPKNKNRNRVYRDVSPFDHSRIKLH
QEDNDYINASLIKMEEAQRSYILTQGPLPNTCGHFWMVWEQKSRGVVMLNRVMEKGLK
CAQYWPQKEEKEMIFEDTNLKLTLISEDIKSYITVRQLELENLTTQETREILHFHYTTWP
DFGVPEPASFLNLFKVRRESGSLSPEHGPVVVHCSAGIGRSGTFCLADTCLLLMDKRKD
PSSVDIKKVLLEMRKFRMGLIQTADQLRFSYLAVIEGAKFIMGDSSVQDQWKELSHEDLE
PPPEHIPPPFRPKRILEPHNGKCREFFPNHQWVKEETQEDKDCPIKEEKGSPLNAAPYG
IESMSQDTEVRSRVVGGSLRGAQAASPAKGEPSLPEKDEDHALSYWKPFLVMNMCVATVLT
AGAYLCYRFLFNSNT
```

>sp|P17706|PTN2\_HUMAN Tyrosine-protein phosphatase non-receptor type 2 OS=Homo sapiens OX=9606 GN=PTPN2 PE=1 SV=2

```
MPTTIERFEELDTQRRWQPLYLEIRNESHDPHRVAKFPENNRNRVYRDVSPYDHSRVK
LQNAENDYINASLVDEEAQRSYILTQGPLPNTCCHFWMVWVQKTKAVVMLNRIVEKES
VKCAQYWPDDQEMLFKETGFSVKLLSEDKSYITVHLLQLENINSGETRTISHFYHTTW
```

PDFGVPEPASFLNLFKVRSEGLNPDHGPVHCSAGIGRSGTFLVDTCLVLEKGD  
DINIKQVLLNMRKYRMLIQTPDQLRFSYMAIEGAKCIKGDSSIQKRWKELSKEDLSPA  
FDHSPNKIMTEKYNRIGLEEEKLTGDRCTGLSSKMQDTEENSESALRKRIREDRKAT  
TAQKVQQMKQRLNENERKRKRWLWQPILTKMGFMSVILVGFVGTWTLFFQQNAL  
>sp|P29074|PTN4\_HUMAN Tyrosine-protein phosphatase non-receptor type 4 OS=Homo sapiens OX=9606  
GN=PTPN4 PE=1 SV=1

MTSRFRLPAGRTYNVRASELARDRQHTVVCNILLDNTVQAFKVNKHDQGGVLLDVFVK  
HLDLTEQDYFGLQLADDSTDNPRWLDPNKPIRKLKRGSPYSLNFRVKFFVSDPNKLQEE  
YTRYQYFLQIKQDILTGRLPCPSNTAALLASFAVQSELGDYDQSENLSGYLSDYSFIPNQ  
PQDFEKEIAKLHQHIGLSPAFAEFNYLNTARTLELYGVEFHAYARDQSNNEIMIGVMSGG  
ILIIYKNRVRMNTFPWLKIVKISFKCKQFFIQLRKLHESRETLGFMVNYRACKNLWKA  
CVEHHTFRLDRPLPPQKNFAHYFTLGSKFRYCGRTEVQSVQYGEKANKDRVDFARSPS  
KPLARKLMDWEVSRNSISDDRLETQSLPSRSPGTPNHRNSTFTQEGTRLRPSVGHV  
DHMVHTSPSEVFNQSPSSQANSIVLESSPSQETPGDGKPPALPPKQSKNSWNQIHY  
SHSQDLESHINETFDIPSSPEKPTPNGGIPHDNLVLRMKPDENGRFGFNVKGGYDQKM  
PVIIVSRVAPGTPADLCVPRLNEGQVVLINGRDIAEHTHDQVVLFIKASCERHSGELMLL  
VRPNAVYDVVEEKLENEPDFQYIPEKAPLDSVHQDDHSLRESMIQLAEGITGTVLTFD  
QLYRKKPGMTMSCAKLPQNISKNRYRDISPYDATRVILKGNEDYINANYINMEIPSSII  
NQYIACQGPLPHTCTDFWQMTWEQSSMVVMLTTQVERGRVKCHQYWPEPTGSSSYGICYQ  
VTCHSEEGNTAYIFRKMFLNQEKNESRPLTQIYIAWPDHGVDPDSSDFLDFVCHVRNK  
RAGKEPVVVHCSAGIGRTGVLITMETAMCLIECNQPVYPLDIVRTMRDQRAMMIQTPSQ  
YRFVCEAILKVYEEGFVKPLTTSTNK

>sp|P29350|PTN6\_HUMAN Tyrosine-protein phosphatase non-receptor type 6 OS=Homo sapiens OX=9606  
GN=PTPN6 PE=1 SV=1

MVRWFHRDLGLDAETLLKGRGVHGSFLARPSRKNQGDLSLVRVGDQVTHIRIQNSGDF  
YDLYGGEKFATLTELVEYTTQQQVGLQDRDGTIIHLKYPLNCSDPPTSERWYHGHMSGQA  
ETLLQAKGEPWTLVRESLSQPGDFVLSVSDQPKAGPGSPLRVTHIKVMCEGGRYTVGG  
LETFDSLTDLVEHFKKTGIEEASGAFVYLRQPYATRVNAADIENRVLELNKKQES EDTA  
KAGFWEFESLQKQEVKNLHQRLLEGQRPENKGNRYKNILPFDHSRVILQGRDSNIPGSD  
YINANYIKNLGPDENAKTYIASQGCLEATVNDFWQMAWQENSRIVMTTREVKEGRNK  
CVPYWEVGMQRAYGPYSVTNCGEHTTEYKLRRLQVSPLDNGDLIREIWHYQYLSWPDH  
GVPSEPGVLSFLDQINQRQESLPHAGPIIVHCSAGIGRTGTIIVIDMLMENISTKGLDC  
DIDIQKTIQMVRAQRSGMVQTEAQYKFYVAIAQFIETTKKLEVLQSQKQGESEYGNIT  
YPPAMKNAHAKASRTSSKHEDVYENLHTKNKREEKVKKQRSADKEKSGSLKRR

>sp|P35236|PTN7\_HUMAN Tyrosine-protein phosphatase non-receptor type 7 OS=Homo sapiens OX=9606  
GN=PTPN7 PE=1 SV=3

MVQAHGGRSRAQPLTLLSGLAAMTQPPPEKTPAKKHVRLQERRGSNVALMLDVRSLGAVEP  
ICSVNTPREVLHFLRTAGHPLTRWALQRQPPSPKQLEEEFLKIPSNFVSPEDLDIPGHA  
SKDRYKTIILPNPQSRVCLGRAQSQEDGDYINANYIRGYDGKEKVYIATQGPMPNTVSDFW  
EMVQEEVSLIVMLTQLREGKEKCVHYWPTTEETYGPFQIRIQDMKECEPYTVRQLTIQY  
QEERRSVKHILFSAWPDHQTPEAGPLLRVAEVEESPETAHGPVIVHCSAGIGRTGC  
FIATRIGCQQLKARGEVDILGIVCQLRLDRGGMIQTAEQYQFLHHTLALYAGQLPEEPPSP

>sp|P43378|PTN9\_HUMAN Tyrosine-protein phosphatase non-receptor type 9 OS=Homo sapiens OX=9606  
GN=PTPN9 PE=1 SV=1

MEPATAPRPMAPELTPEEEQATKQFLEEINKWTVQYNVSPLSWNVAVKFLMARKFDVLR  
AIELFHSYRETRRKEGIVLKPHEEPLRSEILSGKFTILNVRDPTGASIALFTARLHHPH  
KSVQHVVLLQALFYLLDRAVDSFETQRNGLVFIYDMCGSNYANFELDGLGKVLNLLKGAFF  
ARLKKVILVIGAPIWFRVPYSIISLLLDKVRERIQLKTEVTQHLPRECLPENLGGYVK  
IDLATWNFQFLPQVNGHPDPFDEIILFSLPPLDWDVSVHVPGHAMTIQELVDYVVARQK  
QGIYEEYDIRRENVPVGFHCSMSPGNLEKNRYGDVPCLDQTRVKLTKRSGHTQTDYINA  
SFMGDYQKQNAIYIGTQGPLNTYRDFWLMVWEQKVLVIVMTTRFEEGRRKCGQYWPLEK  
DSRIRFGFLTVTNLGVNMMHYKTTLEIHNTTEERQRQVTHQFLSWPDYGVPSAASL  
IDFLRVVRNQQLAVSNMGAASKGQCPEPPIVHCSAGIGRTGTFCSLDIDCLAQLEELGT  
LNVFQTVSRMRTQRAFSIQTPYCYKAILFAEKMGVSSGQNLAVESQ

>sp|Q06124|PTN11\_HUMAN Tyrosine-protein phosphatase non-receptor type 11 OS=Homo sapiens OX=9606  
GN=PTPN11 PE=1 SV=2

MTSRRWFHPNITGVEAENLLTRGVDSFLARPSKSNPGDFTLSVRRNGAVTHIKIQNTG  
DYYDLYGGEKFATLAEVQYMEHHGQLKEKNGDVIELKYP LNCADPTSERWFHGLSGK  
EAEKLLTEKKGHSFLVRESQSHPGDFVLSVRTGDDGESNDGKSKVTHVMIRCQELKYD  
VGGGERFDSLTDLVEHYKKNPMVETLGTVLQLKQPLNTRINAAEIESRVRELSKLAETT  
DKVKQGFWEFETLQQQECKLLYSRKEGQRQENKNKNRYKNILPFDHTRVVLHDGDPNEP  
VSDYINANIIMPEFETKCNNSKPKSYIATQGCQNTVNDVFRMVFQENSRIVMTTKEV  
ERKSKCKVYWPDEYALKYGVMRVRNVKESAHDYTLRELKLSKVGQALLQGNTERTVW  
QYHFRTPDHGVPSPDGGVLDLLEEVEHHKQESIMDAGPVVHCSAGIGRTGTFFIVDILI  
DIIREKGVDCIDVPKTIQMVRSQRSGMVQTEAQYRFIYMAVQHYIETLQRRIEEEQKSK  
RKGHEYTIKYSLADQTSGDQSPLPCTPTPPCAEMREDSARVYENVGLMQQKSF

>sp|Q05209|PTN12\_HUMAN Tyrosine-protein phosphatase non-receptor type 12 OS=Homo sapiens OX=9606  
GN=PTPN12 PE=1 SV=3

MEQVEILRKFIQRVQAMKSPDHNGEDNFARDFMRLRRLSTKYRTEKIYPTATGEKEENVK  
KNRYKDILPFDHSRVKLTLPKTPSQSDYINANFIKGVYGPAYVATQGPLANTVIDFWRM  
IWEYNVVIIVMACREFEMGRKKCERYWPLYGEDPITFAPFKISCEDEQARTDYFIRTL  
EFQNESRRLYQFHYVNWPDHDPVSSFSDSILDMISLMRKYQEHEDEVPICIHCSAGCGRTGA  
ICAIDYTNLLKAGKIPPEFNVFLIQEMRTQRHSAVQTKQEYELVHRAIAQLFEKQLQL  
YEIHGAQKIADGVNEINTENMVSSIEPEKQDSDPPKPPRTRSCLEVGDAKEEILQPPPEP  
PVPPIILTPSPSAPFTVTVMQDNDRYHHPKPVLMHVSSEQHSADLNRNYSKSTELPGKNE  
STIEQIDKKLERNLSFEIKKVLQEGPKSFDGNTLLNRGHAIKIKSASPCIAADKISKPQE  
LSSDLNVGDTSQNSCVDCSVTQSNKVSVPPEESQNSDTPPRPDRPLDDEKGHVTSFHHG  
PENAIPIPDLESGNSSDINQTRKTVSLTPSPTTQVETPDLVDHNTSPLFRTPLSFTNP  
LHSDSDSDERNSDGAVTQNKTNISTASATVSAATSTESISTRKVLPMIARHNIAGTTH  
SGAEKDVDVSESDPPLPERTPEFVLAHEHNTVPRSEWSELQSQRSEQKKEGLITSE  
NEKCDHPAGGIHYEMCI ECPPTFSDKREQISENPTEATDIGFGRNRCGPKGPRDPPSEWT

>sp|Q12923|PTN13\_HUMAN Tyrosine-protein phosphatase non-receptor type 13 OS=Homo sapiens OX=9606  
GN=PTPN13 PE=1 SV=2

MHVSLAEALVRRGGPLQEEIWAVALNQSAESLQELFRKVSADPAALGFIIISPWSLLLP  
SGSVSFTDENISNQDLRAFTAPEVLQNSLTSLSVDEKIHISLGMTLYWGADYEVPSQ  
PIKLGDLNSILLGMCEDVIYARVSVRVLDCSAHIRNSNCAPSFYVVKHLVKLVGNL  
SGTDQLSCNSEQKPDRSQAIRDRLRGKGLPTGRSSTSDVLDIQKPPLSHQTFLNKGLSKS  
MGFLSIKDTQDENYFKDILSDNSGRESENTFSYQFKTSQGEKPIPGIDVLSKKKIWA  
SSMDLLCTADRFSSGETATYRCHPEAVTVRTSTTPRKEARYSDGSIALDIFGPQKMD  
PIYHTRELPTSSAISSALDRIRERQKQLVLEAMNVEEPVRRYKYHGDVFTSSSEPS  
IISSEDFRQVRRSEASKRFESSGLPGVDETLSDGQSRPSRQYETPFEGNLINQEIML  
KRQEEELMQLQAKMALRQSRSLSLYPGDTIKASMLDITRDPLREIALETAMTQRKLRNFFG  
PEFVKMTEIEPFIISLDLPRISILTKKGKNEENRRKVNIMLLNGQRLELTCDTKTKICKDVFDM  
VVAHIGLVEHHLFALATLKDNEYFFVDPDLKLTVAPEGWKEEPPKKTATVNFLLFFRI  
KFFMDDVSLIQHTLTCHQYYLQLRKDILEERMHCDETSLLLASLALQAEYGDYQPEVHG  
VSYFRMEHYLPARVMEKLDLSYIKEELPKLHNTYVGAKEKETEFLKVCQRLEYGVHF  
HRVHPEKKSQTGILLGVCSKGVLFVHNGVRTLVLRFPWRETKKISFSKKKITLQNTSD  
GIKHGFQTDNSKICQYLLHLCSYQHKFQLQMRARQSNQDAQDIERASFRSLNLQAESVRG  
FNMGRAISTGSLASSTLNKLAVRPLSVQAEILKRLSCSELSLYQLQNSKEKNDKASWE  
EKPREMSKSYHDLQASLYPHRKNVIVNMEPPPQTVAEVVGKPSHQMSRSDAESLAGVTK  
LNNSKSVASLNRSPERRKHESDSSIEDPGQAYVLMHSSGNSSSQVPLKENDVLHKK  
WSIVSSPEREITLVNLKDAKYGLGFQIIGGKMGRLDLGIFISSVAPGGPADLDGCLKP  
GDRLISVNSVSLVSHHAAIEILQNAPEVTLVISQPKKISKVPSTPVHLTNEMKNYM  
KKSSYMQDSAIDSSKDHHSRGTLRHISENSFGPSGGLREGSLSDQSRTEASLSQS  
VNGFFASHLDQTWQESQHGSPSPSVISKATEKETFTDSNQSKTKKPGISDVTYSDRGD  
SDMDEATYSSSQDHQTPKQESSSSVNTSNKMNFKTFSSPPKPGDIFVELAKNDNSLGI  
SVTGGVNTSVRHGGIYVKAIPQGAESDGRHKGDRVLAVNGVLEGATHKQAVETLRN  
TGQVVHLLLEKQSPSTKEHVPVTPQCTLSQNAQGGPEKVKTTQVKDYSFVTEENTF  
EVKLFKNSGLGFSFREDNLIPEQINASIVRVKCLFPGQPAAESGKIDVGDVILKVNGA  
SLKGLSQQEVISALRGTAPEVFLLLCRPPPGVLEIDTALLTPLQSPAQVLPNSSKDSQ  
PSCVEQSTSSDENEMSDKSKKQCKSPRRDSYSDSSGSGEDDLVTAPANISNSTWSSALH  
QTLNSMVSQAQSHHEAPKSQEDTICTMFYYPQKIPNKPEFEDSNPSLPPDMPAGQSYQP  
QSESASSSSMDKYIHHSIETRQENWTPKNDLENHLEDFELEVELLITLIKSEKGLG  
FTVTKGNQRIGCYVHDVQIDPAKSDGRLKPGDRLIKVNDTDVTNMHTDVAVNLRAASKT  
VRLVIGRVLLEPRIPMLPHLLPDITLTCNKEELGFSLCGGHDSLYQVVYISDINPRSVAA  
IEGNLQLLDVIHYVNGVSTQGMTLEEVNRALDMSLPSLVLKATRNDLPVVPSSKRSVSA  
PKSTKNGSYSVSGSCQPALTPNDSFSTVAGEEINEISYPKGCSTYQIKGSPNLTPKE  
SYIQEDDIYDSSQAEVQSLLDVDEEAQNLLNENNAAGYSCPGTLKMNGLSEERTE  
DTCDCGSPLEPYFTEATKMNGCEEYCEEKVKSESLIQKPEKKTDDDEITWGNDELPIER  
TNHEDSDKDHSFLTNDELAVLPVVKVLPSPGKYTGANKSVIRVLRGLLDQGIPSKLENL  
QELKPLDQCLIGQTKENRRKNRYKNILPYDATRVPLGDEGGYINASFIIKIPVKEEFVYI  
ACQGPLPTTVGDFWQMIWEQKSTVIAMMTQEVEGEKIKCQRYWPNILGKTTMVSNRRLRA  
LVRMQQLKGFVVRAMTLEDIQTREVRHISHLNF TAWPDHDTSPQDDLLTFISYMRHIHR  
SGPIITHCSAGIGRSGTLICIDVVLGLISQDLDFDISDLVRCMRQLQRHGMVQTEDQYIFC  
YQVILYVLRQLQAEQEQQPQLK

>sp|Q15678|PTN14\_HUMAN Tyrosine-protein phosphatase non-receptor type 14 OS=Homo sapiens OX=9606  
GN=PTPN14 PE=1 SV=2

MPFGLKLRRTRYNVLKNCVFTRIRLLDSNVIECTLSVESTGQECLEAVAQRLELRETH  
YFGLWFLSKSQARWVELEKPLKKHLDFANEPLLFFGVMFYVNVSWLQGEATRYQYYL  
QVKKDVLGRLRCLDQVIRLAGLAVQADFGDYNQFDSQDFLREYVLPMDLALAEAVLE  
ELTQKVAQEHKAHSGILPAEALMYINEVERLDGFGQEIFPVKDNHGNVHLGIFFMGIF  
VRNRIGRQAVIYRWDMGNITHNKSTILVELINKEETALFHTDDIENAKYISRLFATRHK

FYKQNKICTEQSNPPPIRRQPTWSRSSLPRQQPYILPPVHVQCGEHYSETHTSQDSIFH  
GNEEALYCNSHNSLDLNLNGTVTNGSVCSVHSVNSLNCQSFIQASPVSSNLSIPGSDI  
MRADYIPSHRHSIIIVPSYRPTPDYETVMRQMKRGI LHTDSQSLSRNLNIINTHAYNQP  
EDLVYSQPEMRERHPYTPYGPQGVVSNKLVSPSDQRNPKNNVPSKPGASAI SHTVSTP  
ELANMQLGSHNYSTAHMLKNYLFRRPPYPYRPRPATSTPDLASHRHKYVSGSSPDLVTR  
KVQLSVKTFQEDSSPVVHQSLQEVSEPLTATKHHGTVNKRHSLEVMNSMVRGMEAMTLKS  
LHLPMARRNTLREQGPEEGSGSHEVPQLPQYHHKKTFS DATMLIHSSSEEEEEEEAPES  
VPQIPMLREKMEYSAQLQAALARIPNKPPEYGPGRKSVSNGALRQDQASLPPAMARARV  
LRHGPAKAISMRTPPAVNGASLGPSEPDLT SVKERVKKEPVKERPVSEMF SLEDSI  
IEREMMIRNLEKQK MAGLEAQKRPLMLAALNGLSVARVSGREENRVDATRVPMDFRRTL  
KKKLEEGMVFEYEQIPKKKANGIFSTAALPENAERSRIREVVPEENRVELIPTKENNT  
GYINASHIKVVVGGAEWHYIATQGPLPHTCHDFWQMVWEQGVNVIAMVTAEEEGGRKSH  
RYWPKLGSKHSSATYKFKVTTKFRDTSVCYATTGLKVKHL LSGQERTVWHLQYTDWPDH  
GCPEDVQGF LSYLEEQSVRRHTNSMLEGKTRHPPIVVHCSAGVGRGTGVLILSELMIYC  
LEHNEKVEVPMMLRLLREQRMFIQTIAQYKFVYQVLIQFLQNSRLI

>sp|P18433|PTPRA\_HUMAN Receptor-type tyrosine-protein phosphatase alpha OS=Homo sapiens OX=9606  
GN=PTPRA PE=1 SV=3

MDSWFLVLLGSLICVSANNATTVAPSVGITRLINSSTAEPVKEEAKTSNPTSSLSLS  
VAPTFSPNITLGPYTLTTVNSSSDSDNGTTRTASTNSIGITISPNGTWLPDNQFTDARTEP  
WEGNSSTAATTPETFPSPGNSDKDRDETPIIAVMVALSSLLVIVFIIIVLYMLRFKKY  
KQAGSHSNFRLSNGRTEDVEPQSVPLLARSPSTNRKYPLPVDKLEEEINRRMADDNKL  
FREEFNALPACPIQATCEAASKEENKEKNRYVNI LPYDHSRVHLTPVEGVPDSYINASF  
INGYQEKNFIAAQGPKEETVNDFWRMIEQNTATIVMVTNLKERKECKAQYWPDQGCW  
TYGNIRVSVEDVTVLVDYTVRKFCCIQQVGDMTNRKQRLITQFHFTSWPDFGVPFTP IGM  
LKFLKVKACPNQYAGAI VVHCSAGVGRGTGFVVIDAMLMMHTERKVDVYGFVSRIAQ  
RCQMVMQDMQYVFIYQALLEHYLYGDTELEVTSLETHLQKIYKIPGTSNNGLEEEFKKL  
TSIKIQNDKMRGTGNL PANMKKNRVLQIIPYEFNRV IIPVKRGEENTDYVNASFIDGYRQK  
DSYIASQGPLLHTIEDFWRMIEWEKSCSIVMLTELEERGQEKCAQYWP SDGLVSYGDITV  
ELKKEEECESYTVRDL LVTNTRENKSRQIRQFHFHGWPEV GIPSDGKGMISIIAAVQKQQ  
QQSGNHPITVHCSAGAGRTGTF CALSTVLERVKAEGILDVFQTVKSLRLQRPHMVQTL EQ  
YFCYKVVQYIDAFSDYANFK

>sp|P23467|PTPRB\_HUMAN Receptor-type tyrosine-protein phosphatase beta OS=Homo sapiens OX=9606  
GN=PTPRB PE=1 SV=3

MLSHGAGLALWITLSLLQTGLAEPERCNFTLAESKASSHSVSIQWRILGSPCNFSLIYSS  
DTLGAALCPTFRIDNTTYGCNLQDLQAGTIYNFRIISLDEERTVLQTDPLPPARFGVSK  
EKTTSLSLHVWWTSSGKVT SYEVQLFDENNQKIQGVQIQESTSWNEYTF FNLTAGSKYN  
IAITAVSGGKRSFSVYTNGSTVPSPVKDIGISTKANSLLISWSHGSGNVERYRLMLMDKG  
ILVHGGVVDKHATSYAFHGLTPGYLYNLVMTEAAGLQNYRWKLVRTAPMEVSNLKV TND  
GSLTSLKVKWQRPPGNVDSYNITLSHGKTIKESRVLAPWITETHFKELVPGRLYQVTVSC  
VSGELSAQKMAVGRTFPDKVANLEANNNGRMRS LVVSWSPAGDWEQYRILLFNDSVLL  
NITVGKEETQYVMDDTGLVPGRQYEVIVESGNLKNSERCQGRTVPLAVLQLRVKHANE  
TSLSIMWQTPVAEWEKYIISLADRDL LLIHKSLSKDAKEFTFDLVPGRKYMATVTSISG  
DLKNSSSVKGRTPAQVTDLHVANQGMTSSLFTNWTQAQGDVEFYQVLLIHENVVIKNES  
ISSETSRYSFHLSKSGSLYSVVVTTVSGGISSRQVVVEGRTVPSSVSGVTNNNSGRNDYL  
SVSWLLAPGDVDNVEVTL SHDGKVVQSLVIAKSVRECSFSSLTPGRLYVTITTRSGKYE  
NHSFSQERTVPDKVQGVSVNSARS DYLRVSWHATGDFDHYEVTIKNKNFIQTKSIPK  
SENECVFVQLVPGRLYSVTVTTKSGQYEANEQNGRTIPEPVKDLTLRNRSTEDLHVTWS  
GANGDQVQYEQIQLLFNDMKVFPFHLVNTATEYRFTSLTPGRQYKILVLTISGDVQQSAF  
IEGFTVPSAVKNIHISPNGATDSLTVNWTGGGDVDSYTVSAFRHSQKVDSTIPKHFVE  
HTFHRLEAGEQYQIMIASVSGSLKNQINNVGRTVPASVQGV IADNAYSSYSLIVSWQKAA  
GVAERYDILLTENGILLRNTSEPA TTQHKFEDLTPGKYYKIQLITVSGGLFSKEAQTE  
GRTVPAAVTDLRITENSTRHLSFRWTASEGELSWYNI FLYNPDGNLQERAQVDPLVQSFS  
FQNL LQGRMYKMVIVTHSGELSNESFIFGRTPASVSHLRGSRNRNTDLSLWFNWPASGD  
FDFYELI LYNPNTGKKNWKDKDLTEWRFQGLVPGRKYVLLVWVTHSGDLSNKVTAESRTA  
PSPPLMSFADIAN TSLAITWKGPPDWDYND F ELQWLPRDALTVFNPNRKRSEGRIVY  
GLRPGRSYQFNVKT VSGDSWKTYSKPIFGSVRTPDKIQNLHCRPQNSTAIACSWIPPDS  
DFDGYIECRKMDTQEV EFSRKEKEKSLLNIMMLVPHKRYLVSIKVQSAGMTSEVVEDS  
TITMIDRPPPPPHIRVNEKDV LISKSSINFTVNC SWFSDTNGAVKYFTVVVREADGSDE  
LKPEQQHPLPSYLEYRHNASIRVYQTNYFASKCAENPNSNSKSFNIKLGAE MESLGGKCD  
PTQQKFCDGPKPH TAYRISIRAF TQLFDEDLKEFTKPLYSDTFFSLPITTESEPLFGAI  
EGVSAGLFLIGMLVAVVALICRQKVSHGRERPSARLSIRDRPLSVHLNLGQKGNR KTS  
CPIKINQFEGHFMKLQADSNYLLSKEYEELKDVGRNQSCDIALLPENRGKNRYNNILPYD  
ATRVLKSNVDDDCSDYINASYIPGNFRREYIVTQGPLPGTKDDFWKMMWEQNVHNIVM  
VTQCVEKGRVKCDHYWPADQDSL YYGDLILQMLSESVLPEWTIREFKICGEEQLDAHRLI  
RHFHYTVWPDHGVPE TTQSLIQFVRTVRDYINRSPGAGPTVVHCSAGVGRGTGTFIALDRI  
LQQLDSKDSVDIYGAVHDLRLHRVHMVQTECQYVYLHQCVRDVLRARKLRSEQENPLFPI

YENVNPEYHRDPVYSRH

>sp|P08575|PTPRC\_HUMAN Receptor-type tyrosine-protein phosphatase C OS=Homo sapiens OX=9606 GN=PTPRC PE=1 SV=3

MTMYLWLKLLAFGFALDTEVFTGQSPTPSPTGLTTAKMPSVPLSSDPLPHTHTAFSPA  
STFERENDFSETTSLSPDNTSTQVSPDSLNASAFNTTGVSSVQTPHLPHTADSQTPSA  
GTDQTFTSGSAANAKLNPTPGSNAISDVPGERSTASTFPTDVPVPLTTTLLSLAHSSAAL  
PARTSNTTITANTSDAYLNASETTTLSPSGSAVISTTTIATTPSKPTCDEKYANITVDYL  
YNKETKLFATAKLVNENVECGNNTCTNNEVHNLTECKNASVSISHNSCTAPDKTLILDVP  
PGVEKFLHDCTQVEKADTTICLKWKNIETFTCDTQNIITYRFQCGNMIFDNKEIKLENLE  
PEHEYKCDSEILYNNHKFTNASKIIKTDFGSPGEPQIIFCRSEAAHQGVITWNPQRFSH  
NFTLCYIKETEKDLNLDKNLIKDYDLQNLKPYTKYVLSLHAYIIAKVQRNGSAAAMCHFTT  
KSAPPSQVWMTVSMSTSDNSMHVKCRPPRDRNGPHERYHLEVEAGNTLVRNESHKNCDFR  
VKDLQYSTDYTFKAYFHNGDYPGEPFILHHSTSYNSKALIAFLAFLLIIVTSIALLVLYK  
IYDLHKKRSCNLDDEQQELVERDDEKQLMNVEPIHADILLETYKRIADEGRLFLAEFQSI  
PRVFSKFPKEARKPFNQKNRYVDILPYDYNRVELSEINGDAGSNYINASYIDGFKEPR  
KYIAAQGPRDETVDDFWRMIWEQKATVIVMVTRCEEGRNKAELYWPSMEEGTRAFGDVV  
VKINQHKRCPDYIIQKLNIVNKKKATGREVTHIQFTSWPDHGVPEPDLKLRVNA  
FSNFFSGPIVWHCSAGVGRGTGYIGIDAMLEGLEAENKVDVYGVVKKRRQRCLMVQVEA  
QYILIHQALVEYNQFGETEVNLSLHLYLHNMKKRDPPEPSPLEAEFQRLPSYRSWRTQ  
HIGNQEENKSKNRNSNVPYDYNRVPLKHELEMSKESEHDSDESSDDSDSEEPSKYINA  
SFIMSYWKPEVMIAAQGPLKETIGDFWQMIQKRVKVIIVMLTELKHGDQEIQAQYWGEGK  
QTYGDIEDVLDKTDKSSYTLRVFELRHSKRKDSRTVYQYQYTNWSVEQLPAEPKELISM  
IQVVKQLPQKNSSEGNKHHKSTPLLHICRDGSQQTGIFCALLNLLLESAETEEVVDIFQV  
VKALRKARPGMVSTFEQYQFLYDVIASTYPAQNGQVKKNNHQEDKIEFDNEVDKVKQDAN  
CVNPLGAPEKLEPAKEQAEGSEPTSGTEGPEHSVNGPASPALNQQS

>sp|P23469|PTPRE\_HUMAN Receptor-type tyrosine-protein phosphatase epsilon OS=Homo sapiens OX=9606 GN=PTPRE PE=1 SV=1

MEPLCPLLLVGFSLPLARALRGNETTADSNETTTSGPPDPGASQPLLAWLLPLLLLLL  
VLLLAAYFFRFRKQKAVVSTSDKKMPNGILEEQEQQRVMLLSRSPSGPKKYFPIVPEHL  
EEEIRIRSADDCKQFREEFNLSPSGHIQGTFFELANKEENREKNRYPNILPNDHSRVLSQ  
LDGIPCSDYINASYIDGYKEKNKFAAQGPKQETVNDVFRMVEQKSATIVMLTNLKERK  
EEKCHQYWPDQGCWYGNIRVCVEDCVLVLDYTIKFCIQPLPDGCKAPRLVSQLHFTS  
WPDFGVPTPIGMLKFLKVKTLNVPVHAGPIVHCSAGVGRGTGTFIVIDAMMMHAEQK  
VDVFEFVSRIRNQRPMQVQTMQYTFIYQALLEYYLYGDELDVSSLEKHLQTMHGTTTH  
FDKIGLEEFKRLTNVRIMKENMRTGNL PANMKKARVIQIIPYDFNRVILSMKRGQYTD  
YINASFIDGYRQKDYFIATQGPLAHTVEDFWRMIEWKSHIVMLTEVQEREQDKCYQYW  
PTEGSVTHGEITIEIKNDTLEAISIRDFLVTLNQPARQEEQVRVVRQFHHGWPEIGI  
PAEGKGMIDLAAVQKQQQTGNHPITVHCSAGAGRTGTFIALSNILERVKAEGLLDVFQ  
AVKSLRLQRPHMVQTLQYEFQYKVVQDFIDIFSDYANFK

>sp|P23470|PTPRG\_HUMAN Receptor-type tyrosine-protein phosphatase gamma OS=Homo sapiens OX=9606 GN=PTPRG PE=1 SV=4

MRRLLGPCWILFLKITSSVLHYVCFPALTEGYVVGALHENRHGSAVQIRRRKASGDPYW  
AYSAGYGEHWTSSVSCGGRHQSPIDILDQYARVGEYQELQLDGFDNESNKTWMKNT  
GKTVAILLKDDYFVSGAGLPGRFKAKEVFEHWGHSNGSAGSEHSINGRRFPVEMQIFFYN  
PDDFDSFQTAISENRIIGAMAIFFQVSPRNSALDPIIHGLKGVVHEKETFLDPFVLRD  
LLPASLGSYYRYTGSLLTPPCSEIVEWIVFRRPVPISYHQLFAFYIFTEQQDHVKSVE  
YLRNFRPQQLHDRVVSKSAVRDSWNHDMDFLENPLGTEASKVCSPPIMHKVQPLNQ  
TALQVSWSQPETIYHPPIMNYMISYSWTKNEDEKEKFTKDSKDLKATISHVSPDSL  
FRVQAVCRNDRSDFSQTMLFQANTTRIFQGRIVKTGVPTASPASSADMAPISSGSSTW  
TSSGIPFVSVSMATGMGPSSSGSQTAVASVVTSTLLAGLFGGGGISSFPSTVWPTRLPT  
AASASKQAARPVLATTEALASPGPDGDSPTKDGEGETEKEKDEKSESEDEREHEEDGE  
KDEKKEKSGVTHAAEERNQTEPSPSPNRTAEGGHQITIPGHEQDHTAVPTDQTGGRR  
DAGPGLDPMVTSTQVPPATEEQYAGSDPKRPEMPSKPKMPSRGDRFSEDSRFITVNP  
KNTSGMISRPAAPGRMEWIIPLIVVSALTFVCLILLIAVLVYWRGCKIKSKGFPRRREV  
PSSGERGEKSRKCFQTAHFYVEDSSPRVVPNESIPIIPIPDMEAIIPVKQFVKHIGEL  
YSNNQHGFSEDFEEVQRCTADMNITAHSNHPENKHNRYINILAYDHSRVKLRPLPGKD  
SKHSDYINANYVDGYNKAKAYIATQGPLKSTFEDFWRMIEWQNTGIIVMITNLVEKGRK  
CDQWPTENSEEYGNIIIVTLKSTKIHACYTVRRFSIRNTKVKKGQKGNPKGRQNERVVIQ  
YHYTQWPDMPGVEYALPVLTFVRRSSAARMPETGPVLVHCSAGVGRGTGYIVIDSMLQOI  
KDKSTVNVLGLKHIRTQRNYLVQTEEQYIFIHDALEAILGKETEVSNNQLHSYVNSIL  
IPGVGGKTRLEKQKLVQTCNAKYVECFSAQKECNKEKNRNSVVPSEARARVGLAPLPGM  
KGTDYINASYIMGYRSNEFIITQHPLPHTTKDFWRMIWDHNAQIIVMLPDNQSLAEDEF  
VYWPSREESMNCEAFVTLLISKDRLCLSNEEQIIHDFILEATQDDYVLEVRHFQCPKWP  
NPDAPISSTFELINVIKEEALTRDGPTIVHDEYGAVSAGMLCALTTLSQQLLENENAVDVF  
QVAKMINLMRPGVFTDIEQYQFIYKAMLSLVSTKENGPMPTVDKNGAVLIAEDSDPAES  
MESLV

>sp|Q12913|PTPRJ\_HUMAN Receptor-type tyrosine-protein phosphatase eta OS=Homo sapiens OX=9606  
GN=PTPRJ PE=1 SV=3  
MKPAAREARLPPRSPGLRWALPLLLLLLRLGQILCAGGTPSPIDPDSVATVATGENGITQ  
ISSTAESFHKQNGTGPQVETNTSEDESSGANDSLRTPQGSNGTDGASQKTPSSTGPS  
PVFDIKAVSISPTNVILTWKSNDAASEYKYVVKHKMENEKTTITVHQPWCNITGLRPAT  
SYVFSITPGIGNETWGDPRVIVKITEPIVSDLRVALTGVRKAALSWSNGNGTASCRVLL  
ESIGSHEELTQDSRLQVNIISGLKPGVQYNINPYLLQSNKTKGDPLGTEGGLDASNTERS  
AGSPTAPVHDESLVGPVDPSSGQSRDTEVLLVGLPEGTRYNATVYSQAANGTEGQPQAI  
EFRTNAIQVFDVAVNISATSLTLIWKVSDNESSNYTYKIHVAGETDSSNLNVSEPRAV  
IPGLRSSTFYNITVCPVLGDIIEGTPGFLQVHTPPVPVSDFRVTVVSTTEIGLAWSSHDAE  
SFQMHITQEGAGNSRVEITTNQSIIGGLFPGTKYCFEIVPKGPNTEGASRTVCNRTVP  
SAVFDIHVVVYTTTMMWLDWKSPPGASEVYVHLVIESKHGNSHTSTYDKAITLQGLIPGT  
LYNITISPEVDHWGDPNSTAQYTRPSNVSNDVSTNTTAATLSWQNFDDASPTYSYCLL  
IEKAGNSSNATQVVDITIGITDATVTEIPGSSYTVEIFAQVGDGKSLKLEPGRKSFCTDPA  
SMASFDCVVPKPEPALVWKWTCPPGANAGFELEVSSGAWNNATHLESCSENGTEYRTEV  
TYLNFSTSYNISITTVSCGKMAAPTRNTCTTGITDPPPPDGSNITSVSHNSVKVKSFGF  
EASHGPIKAYAVILTTGEAGHPSADVLYTYEDFKKGASDTYVTVLIRTEEKGRSQSLSE  
VLKYEIDVGNESTLGYNGKLEPLGSYRACVAGFTNITFHPQNKGLIDGAEYSVFSRY  
SDAVSLPQDPGVICGAVFGCIFGALVIVTVGGFIFWRKRRKDAKNNVFSQIKPKKSKL  
IRVENFEAYFKKQADSNCGFAEYEDLKLVGISQPKYAAELAENRGKNRYNNVLPYDIS  
RVKLSVQTHSTDDYINANYMPGYHKKDFIATQGPLNPLKDFWRMVWEKNVYAIIMLTK  
CVEQGRTKCEEYWPSKQAQDYGDITVAMTSEIVLPEWTIRDFTVKNIQTSESHPLRQFHF  
TSWPDHGVPTDILLINFRLVRDYMKSPPESPILVHCSAGVGRGTGTFIAIDRLIYQIE  
NENTVDVYGVYDLRMLRPLMVQTEDQYVFLNQCVDLIVRSQKDSKVDLIYQNTTAMTIY  
ENLAPVTTFGKNGYIA

>sp|P28827|PTPRM\_HUMAN Receptor-type tyrosine-protein phosphatase mu OS=Homo sapiens OX=9606  
GN=PTPRM PE=1 SV=2  
MRGLGTCLATLAGLLTAAGETFSGGCLFDEPYSTCGYSQSEGDDFNWEQVNTLTKPTSD  
PWWPSSGFMVLNAGSRPEGQRAHLLLPQLKENDTHCIDFHYFVSSKSNPPGLLNYYVKV  
NNGPLGNPIWNIISGDPTRTWNRAELAISTFWPNFYQVIFEVITSGHQGYLAIDEVKVLGH  
PCTRTPHFLRIQNEVNAVAGQFATFQCSAIGRTVAGDRLWLQGDVDRDAPLKEIKVTSRR  
FIASFNVVNTTKRDAGKYRCMIRTEGGVGISNYAELVVKPEPPVPIAPPQLASVGATYLWI  
QLNANSINGDGPVIVAREVEYCTASGSWNRQPDSTSYKIGHLDPDTEYEISVLLTRPGE  
GGTGSPPALRTRTKCADPMRGRKLEVVVKSQRQITIRWEPFGYVNVTRCHSYNLTVHYC  
YQGGQEYVREEVSWDTEHNSHPQHTITNLSPTYNVSVKLIIMNPEGRKESQELIVQTDDE  
LPGAVPTESIQGSTFEKIFLQWREPTQTYGVITLYEITYKAVSSFDPEIDLSNQSGRVS  
KLGNETHFLFFGLYPGTTYSFTIRASTAKGFGPPATNQFTTKISAPSMPAYELETPLNQT  
DNTVTVMKPAHRSRGAPVSVYQIVVEEERPRRTKKTTEILKCYVPIHFQNASLLNSQYY  
FAAEFPADSLQAAQPFITGDNKTYNGYWNTPLLPYKSYRIYFQAASRANGETKIDCVQVA  
TKGAATPKVPPEKQTDHTVKIAGVIAGILLFVIIIFLGVVLMKKRKLAKKRKETSST  
RQEMTMVMSMDKSYAEQGTNCDEAFSMDTHNLNGRSVSSPSSFTMKTNTLSTVPSNSY  
YPDEHTMASDSSLVQSHTYKKREPADVPYQGTQLHPAIRVADLLQHITQMKCAEGYGF  
KEEYESFFEGQSPAPWDSAKKDENRMKNRYGNIAYDHSRVLQTIIEGDTNSDYINGNYID  
GYHRPNHYIATQGMQETIYDFWRMVWHENTASIMVTNLVEVGRVKCKKYWPDDEIYK  
DIKVTLIETELAEYVIRTFAVEKRGVHEIREIRQHFHTGWPDPHGVPHYATGLLGFVRQV  
KSKSPSAGPLVHCSAGAGRTGCFIVIDIMLDMAREGVVDIYNVRELSRRVNMVQT  
EEQYVFIHDAILEACLGDTSVPASQVRSLYYDMNKLDPQTNSQIKKEEFRTLNMVPTL  
RVEDCSIALPRNHEKNRCDILPPDRCLPFLITIDGESSNYINAALMDSYKQPSAFIVT  
QHPLPNTVKDFWRLVLDYHCTSVMLNDVDPALCPQYWPENGVHRHGPQVVEFVSADLE  
EDIISRIFRIYNAARPQDGYRMVQQFQFLGWPMYRDPVSKRSFLKLIQVQDKWQEEYNG  
GEGRTVVHCLNGGSGTFCASIVCEMLRHQRTVDVHFVAVKTLRNNKPNMVDLLDQYKF  
CYEVALEYLNSG

>sp|Q13332|PTPRS\_HUMAN Receptor-type tyrosine-protein phosphatase S OS=Homo sapiens OX=9606 GN=PTPRS  
PE=1 SV=3  
MAPTWGPMVSVVGPMLLVLLVGGCAAEPPRFIKEPKDQIGVSGGVASFVCQATGDP  
KPRVTWKKGKKVNSQRFFETIEFDESAGAVLRIQPLRTPRDENVYECVAQNSVGEITVHA  
KLTVLREDQLPSGFNIDMGPQLKVVERTRTATMLCAASGNPDPEITWFKDFLPVDPAS  
NGRIKQLRSETFESTPIRGALQIESSEETDQGYECVATNSAGVRYSSPANLYVRELREV  
RRVAPRFSILPMSHEIMPGGNVNITCVAVGSPMPYVVKWQGAEDLTPEDDMPVGRNVLEL  
TDVKDSANYTCVAMSSLGVIEAVAQITVKS LKAPGTPMVTENTATSITITWDSGNPDV  
SYVYIEYKSKSQDGPYQIKEDITTRYISIGGLSPNSEYEIWSAVNSIGQPPSESVVTR  
TGEQAPASAPRNVQARMLSATMIVQWEPEVPEPGLIRGYRVYVTEPEHPVGNWQKHNV  
DSDLTTVGSLLEDETYTVRVLAFTSVGDGPLSDPIQVKTQQGVPQPMNLAERSET  
ITLSWSPPRQESIKEYELFREGDHGREVGRTFDPTTSYVVEDLKPNTYAFRLAARSQ  
GLGAFTPVVRQRTLQSKPSAPPQDVKCVSVRSTAILVSWRPPPEPTHNGALVGYSVRYRP  
LGEDPEPEKVENGIPTTTQILLEALEKWTQYRITVAHTEVGGPESSPVVVRTDEDVP

SAPPRKVEAEALNATAIRVLWRSPAPGRQHGIQYQVHYVRMEGAEARGPPRIKDVMLA  
 DAQWETDDTAIEMVITNLQPETAYSITVAAYTMKGDGARSKPKVWVTKGAVLGRPTLSV  
 QQTPEGSLARWEPPAGTAEDQVLGYRLQFGREDSTPLATLEFPPESEDRYTASGVHKGAT  
 YVFRLAARSRGGEGEEAAEVLSPEDTPRGHPQILEAAGNASAGTVLLRWLPPVPAERNG  
 AIVKYTVAVREAGALGPARETELPAAAEPGAENALTLQGLKPDATYDLQVRAHTRRGGPG  
 FSPVRYRTFLRDQVSPKNFKVMMKTSVLLSWEFPDNYNSPTPKIQYNGLTLDVDGR  
 TTKKLITHLKPHTFYNFVLTNRGSSLGGLQQTVAWTAFAFNLNGKPSVAPKPDADGFIMV  
 YLPDQSPVPVQSYFIVMVLRLKSRGGQFLTPLGSPEDMDLEELIQDISRLQRRSLRHSR  
 QLEVPRPIAARFVSLPPTFHPGDQKQYGGFDNRGLEPHRYVLFVLAVLQKSEPTFAAS  
 PFDSPFLDNDPDPQIVDGEGLIWWIGPVLAVVFIICIVIAAILLYKNKPKSKRDKSEPR  
 TKCLLNNADLAPHHPKDPVEMRRINFQTPDSGLRSPLEPGFHFESMLSHPPPIADMAE  
 HTERLKANDSLKLSQEYESIDPGQQTWEHSNLEVNKPKNRYANVIAIDHSRVLQPIEG  
 IMGSDYINANYVDGYRCQYAIATQGPLPETFGDFWRMVWEQRSATIVMMTRLEEKSRK  
 CDQWPNRGTETYGFIVTLLDTIELATFCVRTFSLHKNGSSEKREVRQFQFTAWPDHGV  
 PEYPTPFLAFLRRVKTCNPPDAGPIVVHCSAGVGRGCFIVIDAMLERIKPEKTVDVYGH  
 VTLMRSQRNYMQTEDQYSFIEHEALAEVGCNGTEVPARSLYAYIQKLAQVEPGEHVTGM  
 ELEFKRLANSKAHSTRFISANLPCNKFKNRLVNIMPYESTRVCLQPIRGVEGSDYINASF  
 IDGYRQQKAYIATQGPLAETTEDFWRMLWENNSTIVVMLTKLREMGREKCHQYWAERSA  
 RYQYFVVDPMAEYNMPQYILREFKVTDARDGQSRVTRQFQFTDWPEQGVKSGEGFIDFI  
 GQVHKTKEQFGDGPISVHCSAGVGRGTFITLSIVLERMRYEGVVDIFQTVKMLRTQRP  
 AMVQTEDEYQFCYQAALYELGSDHYAT

>sp|Q93096|TP4A1\_HUMAN Protein tyrosine phosphatase type IVA 1 OS=Homo sapiens OX=9606 GN=PTP4A1  
 PE=1 SV=2

MARMNRPAPVEVYTKNMRFLITHNPTNATLNKFIIEELKKYGVTTIVRCEATYDITLVEK  
 EGIHVLDPFDDGAPPSNQIVDDWLSLVKIKFREEPGCCIAVHCVAGLGRAPVLVALALI  
 EGGMKYEDAVQFIRQKRRGAFNSKQLLYLEKYRPMRLRFKDSNGHRNCCIQ

>sp|Q12974|TP4A2\_HUMAN Protein tyrosine phosphatase type IVA 2 OS=Homo sapiens OX=9606 GN=PTP4A2  
 PE=1 SV=1

MNRPAPVEISYENMRFLITHNPTNATLNKFTTEELKKYGVTTLVVRCDATYDKAPVEKEGI  
 HVLDWPFDDGAPPNQIVDDWLNLLKTKFREEPGCCVAVHCVAGLGRAPVLVALALIECG  
 MKYEDAVQFIRQKRRGAFNSKQLLYLEKYRPMRLRFRTDNGHCCVQ

>sp|O75365|TP4A3\_HUMAN Protein tyrosine phosphatase type IVA 3 OS=Homo sapiens OX=9606 GN=PTP4A3  
 PE=1 SV=2

MARMNRPAPVEVSYKHMRFILITHNPTNATLSTFIEDLKKYGATTVVRVCEVYDKTPLEK  
 DGITVVDWPFDDGAPPKVVVDWLSLVKAKFCEAPGSCVAVHCVAGLGRAPVLVALALI  
 ESGMKYEDAIQFIRQKRRGAINSKQLTYLEKYRPMRLRFKDPHTHKTRCCVM

|                       |                                                                               |
|-----------------------|-------------------------------------------------------------------------------|
| Date of job execution | May 15, 2018                                                                  |
| Job identifier        | A201805159011D4373CD8E192AC56F039114E7259040EE9S (jobs are stored for 7 days) |
| Running time          | 24 seconds                                                                    |
| Identical positions   | 0                                                                             |
| Identity              | 0%                                                                            |
| Similar positions     | 5                                                                             |
| Program               | CLUSTALO                                                                      |

|                        | Entry       | Entry name                                    | Protein names                        | Organism                    | Gene name |
|------------------------|-------------|-----------------------------------------------|--------------------------------------|-----------------------------|-----------|
| <a href="#">P10696</a> | PPBN_HUMAN  | <b>Alkaline phosphatase, placental-lik...</b> | <a href="#">Homo sapiens (Human)</a> | <b>ALPL2</b> ALPPL          |           |
| <a href="#">P18031</a> | PTN1_HUMAN  | <b>Tyrosine-protein phosphatase non-re...</b> | <a href="#">Homo sapiens (Human)</a> | <b>PTPN1</b> PTP1B          |           |
| <a href="#">P17706</a> | PTN2_HUMAN  | <b>Tyrosine-protein phosphatase non-re...</b> | <a href="#">Homo sapiens (Human)</a> | <b>PTPN2</b> PTPT           |           |
| <a href="#">P29074</a> | PTN4_HUMAN  | <b>Tyrosine-protein phosphatase non-re...</b> | <a href="#">Homo sapiens (Human)</a> | <b>PTPN4</b>                |           |
| <a href="#">P29350</a> | PTN6_HUMAN  | <b>Tyrosine-protein phosphatase non-re...</b> | <a href="#">Homo sapiens (Human)</a> | <b>PTPN6</b> HCP, PTP1C     |           |
| <a href="#">P35236</a> | PTN7_HUMAN  | <b>Tyrosine-protein phosphatase non-re...</b> | <a href="#">Homo sapiens (Human)</a> | <b>PTPN7</b>                |           |
| <a href="#">P43378</a> | PTN9_HUMAN  | <b>Tyrosine-protein phosphatase non-re...</b> | <a href="#">Homo sapiens (Human)</a> | <b>PTPN9</b>                |           |
| <a href="#">Q06124</a> | PTN11_HUMAN | <b>Tyrosine-protein phosphatase non-re...</b> | <a href="#">Homo sapiens (Human)</a> | <b>PTPN11</b> PTP2C, SHPTP2 |           |
| <a href="#">Q05209</a> | PTN12_HUMAN | <b>Tyrosine-protein phosphatase non-re...</b> | <a href="#">Homo sapiens (Human)</a> | <b>PTPN12</b>               |           |

|                        | Entry       | Entry name                                    | Protein names                        | Organism                             | Gene name |
|------------------------|-------------|-----------------------------------------------|--------------------------------------|--------------------------------------|-----------|
| <a href="#">Q12923</a> | PTN13_HUMAN | <b>Tyrosine-protein phosphatase non-re...</b> | <a href="#">Homo sapiens (Human)</a> | <b>PTPN13</b> PNP1, PTP1E, PTPL1     |           |
| <a href="#">Q15678</a> | PTN14_HUMAN | <b>Tyrosine-protein phosphatase non-re...</b> | <a href="#">Homo sapiens (Human)</a> | <b>PTPN14</b> PEZ, PTPD2             |           |
| <a href="#">P18433</a> | PTPRA_HUMAN | <b>Receptor-type tyrosine-protein phos...</b> | <a href="#">Homo sapiens (Human)</a> | <b>PTPRA</b> PTPA, PTPRL2            |           |
| <a href="#">P23467</a> | PTPRB_HUMAN | <b>Receptor-type tyrosine-protein phos...</b> | <a href="#">Homo sapiens (Human)</a> | <b>PTPRB</b> PTPB                    |           |
| <a href="#">P08575</a> | PTPRC_HUMAN | <b>Receptor-type tyrosine-protein phos...</b> | <a href="#">Homo sapiens (Human)</a> | <b>PTPRC</b> CD45                    |           |
| <a href="#">P23469</a> | PTPRE_HUMAN | <b>Receptor-type tyrosine-protein phos...</b> | <a href="#">Homo sapiens (Human)</a> | <b>PTPRE</b>                         |           |
| <a href="#">P23470</a> | PTPRG_HUMAN | <b>Receptor-type tyrosine-protein phos...</b> | <a href="#">Homo sapiens (Human)</a> | <b>PTPRG</b> PTPG                    |           |
| <a href="#">Q12913</a> | PTPRJ_HUMAN | <b>Receptor-type tyrosine-protein phos...</b> | <a href="#">Homo sapiens (Human)</a> | <b>PTPRJ</b> DEP1                    |           |
| <a href="#">P28827</a> | PTPRM_HUMAN | <b>Receptor-type tyrosine-protein phos...</b> | <a href="#">Homo sapiens (Human)</a> | <b>PTPRM</b> PTPRL1                  |           |
| <a href="#">Q13332</a> | PTPRS_HUMAN | <b>Receptor-type tyrosine-protein phos...</b> | <a href="#">Homo sapiens (Human)</a> | <b>PTPRS</b>                         |           |
| <a href="#">Q93096</a> | TP4A1_HUMAN | <b>Protein tyrosine phosphatase type I...</b> | <a href="#">Homo sapiens (Human)</a> | <b>PTP4A1</b> PRL1, PTPCAAX1         |           |
| <a href="#">Q12974</a> | TP4A2_HUMAN | <b>Protein tyrosine phosphatase type I...</b> | <a href="#">Homo sapiens (Human)</a> | <b>PTP4A2</b> PRL2, PTPCAAX2, BM-008 |           |
| <a href="#">Q75365</a> | TP4A3_HUMAN | <b>Protein tyrosine phosphatase type I...</b> | <a href="#">Homo sapiens (Human)</a> | <b>PTP4A3</b> PRL3                   |           |

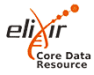

UniProt is an ELIXIR core data resource

Main funding by:

National Institutes of Health

EMBL

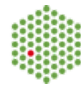

European Molecular  
Biology Laboratory

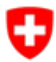

State Secretariat for Education,  
Research and Innovation SERI
